# Impact of decision and action outcomes on subsequent decision and action behaviors

Clara SALERI LUNAZZI, David THURA\* and Amélie J. REYNAUD\*

Lyon Neuroscience Research Center – Impact team  
Inserm U1028 – CNRS UMR5292 – Lyon 1 University

\* Equal contribution to the work

## *Running Head:*

Decision and action influence subsequent decision and action behaviors

## *Corresponding author information:*

David Thura

Lyon Neuroscience Research Center – Impact team  
Inserm U1028 – CNRS UMR5292 – Lyon 1 University  
16 avenue du Doyen Jean Lépine, 69675 Bron, France  
E-mail: david.thura@inserm.fr

## *Manuscript information:*

Abstract: 253 words; Introduction, Methods and Discussion: 3094 words

28 pages – 5 figures

## *Acknowledgements/Funding:*

The authors have no financial or non-financial interests to declare

This work is supported by a CNRS/Inserm ATIP/Avenir grant to David Thura

## 33 Abstract

34 In general, speed-accuracy tradeoff adjustments in decision-making have been studied separately  
35 from those in motor control. In the wild however, animals coordinate their decision and action,  
36 freely investing time in choosing versus moving given specific contexts. Recent behavioral studies  
37 support this view, indicating that humans can trade decision time for movement time to maximize  
38 their reward rate at the level of entire experimental sessions. Besides, it is established that choice  
39 outcomes largely impact subsequent decisions. Crucially though, whether and how a decision also  
40 influences the subsequent motor behavior, and whether and how a motor error influences the next  
41 decision is currently unknown. Here we address these questions by analyzing trial-to-trial changes  
42 of choice and motor behaviors in humans instructed to perform successive perceptual decisions  
43 expressed with reaching movement whose duration was either bounded or unconstrained in  
44 separate tasks. Results indicate that after a bad decision, subjects who were not constrained in their  
45 action duration decided more slowly and more accurately. Interestingly, they also shortened their  
46 subsequent movement duration by moving faster. Conversely, we found that movement errors not  
47 only influenced the speed and the accuracy of the following movement, but those of the decision  
48 as well. If the movement had to be slowed down, the decision that precedes that movement was  
49 accelerated, and vice versa. Together, these results indicate that from one trial to the next, humans  
50 are primarily concerned about determining a behavioral duration as a whole instead of optimizing  
51 each of the decision and action speed-accuracy trade-offs independently of each other.

## 52 Introduction

53 Choosing one action among several options and executing that action are usually considered as  
54 two distinct functions, most often studied separately from each other (e.g. Franklin & Wolpert,  
55 2011; Ratcliff et al., 2016). However, recent behavioral studies indicate that decision and action  
56 are instead tightly linked, sharing important principles and showing a high level of integration  
57 during goal-oriented behavior (Choi et al., 2014; Cos et al., 2011; Haith et al., 2012; Morel et al.,  
58 2017; Shadmehr et al., 2010, 2019; Shadmehr & Ahmed, 2020; Yoon et al., 2018). For example,  
59 human subjects decide faster and less accurately to focus on their actions when the motor context  
60 in which a choice is made is demanding (Reynaud et al., 2020). Similarly, when the temporal cost  
61 of a movement is significantly larger than usual, humans often reduce the duration of their  
62 decisions to limit the impact of these time-consuming movements (Saleri Lunazzi et al., 2021).  
63 Conversely, if the sensory evidence guiding the choice is weak and the deliberation takes time,  
64 humans and monkeys shorten the duration of the movement expressing that choice (Thura, 2020;  
65 Thura et al., 2014). Individuals thus seem to be primarily concerned about determining a global  
66 behavior duration rather than optimizing decision and action durations separately, even if the  
67 resulting decision or movement accuracy must slightly suffer. This “holistic-heuristic” policy may  
68 serve what matters the most for decision-makers during successive decisions between actions, the  
69 rate of reward (Balci et al., 2011; Carland et al., 2019; Thura, 2021).

70 Importantly, most of the adjustments mentioned above occur between blocks of tens to hundreds  
71 of trials, depending on stable contexts favoring a fixed movement or decision speed-accuracy  
72 trade-off. But can these adjustments also occur on shorter time scales, from trial to trial, depending  
73 on the very local one’s decision and motor performance?

74 Indeed, performance history is known to exert a large influence on subsequent behavior (e.g.  
75 Danielmeier & Ullsperger, 2011; Jentsch & Dudschig, 2009; Urai et al., 2019). The most well-  
76 known post-outcome adjustment is a reduction of behavior speed after committing an error,  
77 namely post-error slowing (PES). PES is sometimes accompanied by changes in accuracy,  
78 although conditions leading to PES-related increase or decrease of accuracy are still unclear  
79 (Danielmeier & Ullsperger, 2011; Fievez et al., 2021). Notably, post-outcome adjustments have  
80 been mostly described as the effect of a choice on the decisional performance in the following trial  
81 (Dutilh et al., 2012; Laming, 1979; Rabbitt & Rodgers, 1977; Thura et al., 2017; Urai et al., 2019),  
82 but the influence of a movement outcome on the motor performance in the following trial did not  
83 receive the same attention (Ceccarini & Castiello, 2018). Importantly, the consequences of either  
84 a decision or a motor outcome on *both* subsequent decisions and movements have never been  
85 investigated. These are important questions to address in order to further evaluate the level of  
86 integration of the decision and the action functions during goal-directed behavior.

87 In the present report, we thus aim at investigating the consequences of *a decision outcome* on the  
88 next trial decision *and* motor performance. We also aim at analyzing the effect of *a motor outcome*  
89 on the next trial decision *and* motor performance. Because we make the hypothesis that humans  
90 decide and act in a “holistic-heuristic” way, we predict that any adjustment due to a decision or a  
91 motor outcome will be shared and integrated across the decision and the movement in the next  
92 trial. This hypothesis also predicts that the integrated post-outcome adjustments will depend on  
93 the capacity of the subject to “freely” share decision time for action time, and vice versa, if needed.

94 To test this hypothesis, we analyzed datasets from two recent studies of our group during which  
95 human subjects made successive perceptual decisions between actions. In the first experiment  
96 (Reynaud et al., 2020; Thura, 2020), participants could invest up to 3s in the decision process and

97 had up to 800ms to execute the reaching movement expressing a choice. In the other experiment  
98 (Saleri Lunazzi et al., 2021), the decision component of the task was similar but subjects' reaching  
99 duration was strictly bounded. By analyzing changes of several decision and motor parameters,  
100 we found multiple context-dependent post-decision and post-movement outcome adjustments of  
101 both subsequent decision and motor speed-accuracy tradeoffs.

## 102 [Material and methods](#)

### 103 Participants

104 Two groups of healthy, human subjects participated in the two experiments described in this report.  
105 Twenty subjects (ages: 20-41; 16 females, 4 males; 18 right-handed) performed the free-movement  
106 duration (FMD) task and thirty-one other subjects (ages: 18-36; 20 females, 11 males; 29 right-  
107 handed) performed the constrained-movement duration (CMD) task. All gave their consent orally  
108 before starting the experiment. The ethics committee of Inserm (IRB00003888) approved the  
109 protocol on March 19<sup>th</sup> 2019. Each participant performed two experimental sessions of the same  
110 task. They received monetary compensation for completing each session (either 40€ for the FMD  
111 task or 30€ for the CMD task).

### 112 Datasets

113 The decision and motor behaviors of these subjects have been described in three recent  
114 publications reporting the effects of the decisional context on movement properties (Thura, 2020)  
115 and the effects of the motor context on decision strategies (Reynaud et al., 2020; Saleri Lunazzi et  
116 al., 2021). In these reports, subjects' behavioral adjustments are described either within a given  
117 trial (i.e. the relation between a decision duration and the duration of the movement produced to  
118 express that decision) or between specific conditions designed to set stable decision or motor

119 speed-accuracy contexts in blocks of tens of trials. Here, we aim at describing adjustments of  
 120 subjects' behavior from trial to trial, depending on their decision and/or motor performance.

121

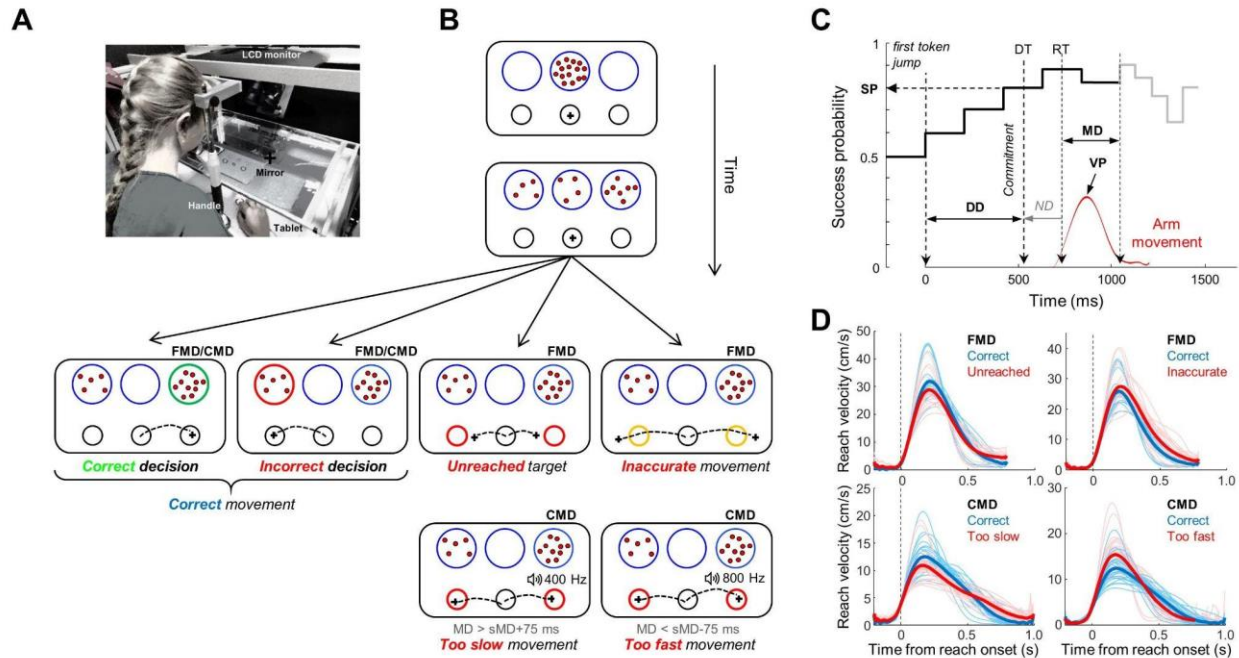

122

123 **Figure 1. Methods.** A. Experimental apparatus, common to both the FMD and CMD tasks. B. Time course  
 124 of a trial in the decision task. Tokens jump one-by-one from the central decision circle to one of the two  
 125 lateral ones. Subjects move a cursor from a central movement target to one of the two lateral ones to express  
 126 their choice. All the decision and action outcomes are illustrated in bottom panels (please refer to the main  
 127 text for details). MD: Movement duration; sMD: Spontaneous movement duration. C. Temporal profile of  
 128 success probability (SP) in one example trial of the choice task. At the beginning of the trial, each target  
 129 has the same success probability (0.5). When the first token jumps into one of the two potential targets (the  
 130 most leftward vertical dotted line), the success probability of that target increases to  $\sim 0.6$ . Success  
 131 probability then evolves with every jump. Subjects execute a reaching movement (red trace) to report their  
 132 choice. Kinematic data allow to compute movement duration (MD) and movement peak velocity (VP).  
 133 Non-decisional (ND) delays, determined in a separate reaction time task, allow to estimate decision duration  
 134 (DD) and success probability (SP) at decision time. Only 10 out of 15 jumps are illustrated on this SP  
 135 profile. D. Average reach velocity profiles aligned on reaching movement onset. Correct and “unreached”  
 136 movements executed in the FMD task are compared in the top left panel; Correct and “inaccurate”  
 137 movements executed in the FMD task are compared in the top right panel. Correct and “too slow”  
 138 movements executed in the CMD task are compared in the bottom right panel. Correct and “too fast”  
 139 movements executed in the CMD task are compared in the bottom left panel.

140

141

## 142 Setup and tasks

143 The experimental apparatus (figure 1A), identical in the two tasks, as well as visual displays (figure  
144 1B), are detailed and illustrated in the previous publications mentioned above (Reynaud et al.,  
145 2020; Saleri Lunazzi et al., 2021; Thura, 2020). The subjects sat in an armchair and made planar  
146 reaching movements using a handle held in their dominant hand. A digitizing tablet (GTCO  
147 CalComp) continuously recorded the handle horizontal and vertical positions (100 Hz with 0.013  
148 cm accuracy). Target stimuli and cursor feedback were projected by a LCD monitor onto a half-  
149 silvered mirror suspended 26 cm above and parallel to the digitizer plane, creating the illusion that  
150 targets floated on the plane of the tablet. Participants were faced with a visual display consisting  
151 of three blue circles (the decision circles) placed horizontally at a distance of 6 cm from each other.  
152 In the central blue circle, 15 tokens were randomly arranged. Positioned below, three black circles,  
153 organized horizontally as well, defined the movement targets. The central black circle radius was  
154 0.75 cm. The size and location of the lateral black circles could vary in blocks of trials depending  
155 on the task. In the free-movement duration (FMD) task, that size was set to be either 0.75 or 1.5  
156 cm of radius, and distance from the central circle was varied to be either 6 or 12 cm (as mentioned  
157 above, effects of target size/position on subjects' behavior are not included in the present report).  
158 In the constrained-movement duration (CMD) task, we analyzed trials for which the target size  
159 was set to be 1.5 cm of radius and distance from the central circle was set to 6 cm.

160 In both the FMD and the CMD tasks (figure 1B), implemented by means of LabView 2018  
161 (National Instruments), subjects initiated a trial by holding the handle into the black central circle  
162 (starting position) for 500 ms. Tokens then started to jump, one by one, every 200 ms, in one of  
163 the two possible lateral blue circles. Subjects had to decide which of the two lateral blue circles  
164 would receive the majority of the tokens at the end of the trial. They reported their decisions by

165 moving the lever into the lateral movement target corresponding to the side of the chosen decision  
166 circle. Crucially, participants were allowed to make and report their choice at any time between  
167 the first and the last token jump. Once a target was reached, the remaining tokens jumped more  
168 quickly to their final circles (figure 1C, gray line), implicitly encouraging subjects to decide before  
169 all tokens had jumped to save time and increase their rate of reward at the session level. In the  
170 FMD task, tokens could speed up either a lot (a jump every 50 ms) or a little (a jump every 150  
171 ms) in given blocks of trials. These block-related effects are not included in the present report. In  
172 the CMD task, the remaining tokens jumped every 50 ms.

173 In the free-movement duration (FMD) task, subjects had up to 800 ms to reach a target and report  
174 their choices. If no target was reached within 800 ms, trials were classified as “unreached” trials,  
175 regardless of the direction of the movement with respect to the starting position. If the subject  
176 reached a target but failed to stop in it within 800 ms, the trial was classified as “inaccurate” trial,  
177 regardless of the choice made, correct or incorrect (figure 1B).

178 In the constrained-movement duration (CMD) task, participants were instructed to reach a target  
179 within a 75-ms time interval around their spontaneous mean movement duration, computed in  
180 dedicated trials (please see Saleri Lunazzi et al., 2021 for details). So, if for a given subject we  
181 estimated a mean spontaneous reaching duration of 400 ms for the 6 cm long movements, then this  
182 subject had to report each of her/his choices by executing a movement whose duration was strictly  
183 bounded between 325 and 475 ms. In this CMD task, a trial was thus considered as a movement  
184 error trial when the subject did not meet these temporal constraints, even if the correct decision  
185 was made. We distinguished either “too slow” and “too fast” movement errors (figure 1B).

186 At the end of each trial of both tasks, a visual feedback about decision success or failure (the  
187 chosen decision circle turning either green or red, respectively) was provided to the subject after



188 the last token jump, assuming a correct movement. In the FMD task, a movement error was  
189 indicated by visual feedback. The chosen movement target turned orange in “inaccurate” trials, the  
190 two movement targets turned red in “unreached” trials. In the CMD task, a movement error was  
191 indicated by both a visual and a 500 ms audio feedback (both movement targets turned red and an  
192 800 or 400 Hz sound indicating that movement was too fast or too slow, respectively, was played).  
193 Subjects had to make a specific number of correct trials (either 320 trials in the FMD task or 160  
194 trials in the CMD task), indirectly motivating them to optimize successes per unit of time.

195 Finally, subjects also performed in each of the two sessions of both tasks a simple delayed-reaching  
196 task (DR task, 100 trials for subjects performing the FMD task and 20 trials for subjects who  
197 performed the CMD task). This DR task was identical to the choice task described above, except  
198 that there was only one lateral decision circle displayed at the beginning of the trial (either at the  
199 right or at the left side of the central circle with 50% probability). All tokens moved from the  
200 central circle to this unique circle at a GO signal occurring after a variable delay ( $1000 \pm 150$  ms).  
201 This DR task was used to estimate the sum of the delays attributable to response initiation (i.e.  
202 non-decision delays).

203 Subsets of trials based on decision and movement outcomes

204 We first defined three subsets of trials common to both tasks (FMD and CMD), based on decision  
205 or movement outcomes: (1) “Correct decision” trials, when the subject chose the correct target and  
206 reported her/his choice with a correct movement; (2) “Incorrect decision” trials, if the participant  
207 chose the incorrect target with a correct movement. Note that for these two subsets, bad movement  
208 trials are excluded because no feedback was provided to the subject to indicate whether or not  
209 she/he chose the correct target. By contrast, a salient feedback was provided at the end of the trial

210 to indicate the movement error (see above and figure 1B); (3) “Correct movement” trials, when  
211 the subject adequately reached the correct or the incorrect target.

212 We defined two other subsets of trials based on movement errors in the FMD task specifically: (1)  
213 “Unreached” trials, when the subjects failed to reach a target (correct or incorrect) before the end  
214 of the movement duration deadline (800 ms); (2) “Inaccurate” trials, when the subjects reached a  
215 target (correct or incorrect) but failed to stop in it.

216 Finally, two subsets of trials were defined based on movement errors in the CMD task specifically:  
217 (1) “Too fast movement” trials and (2) “Too slow movement” trials, when the subjects reached a  
218 target (correct or incorrect) before the minimum instructed duration time and after the maximum  
219 instructed duration time, respectively.

## 220 Data analysis

221 Data were analyzed off-line using custom-written MATLAB (MathWorks) and R ([https://www.r-](https://www.r-project.org/)  
222 [project.org/](https://www.r-project.org/)) scripts. Reaching horizontal and vertical positions were first filtered using polynomial  
223 filters and then differentiated to obtain a velocity profile. Onset and offset of movements were then  
224 determined using a 3.75 cm/s velocity threshold. Reaching movement duration (MD), peak  
225 velocity (VP) and amplitude (Amp) were respectively defined as the duration, the maximum  
226 velocity value and the Euclidean distance between these two events (figure 1C). Reaching  
227 movement accuracy was defined as the Euclidian distance separating the target center from the  
228 movement endpoint location (CED).

229 Decision duration (DD) was computed as the duration between the first token jump and the time  
230 at which subjects committed to their choice (figure 1C). To estimate this commitment time in each  
231 trial, we detected the time of movement onset as mentioned above, defining the subject’s reaction

232 time, and subtracted from it her/his mean sensory-motor delays estimated based on her/his reaction  
233 times in the DR task performed the same day and in the same condition.

234 To assess the influence of sensory evidence on subjects' choices, we computed the success  
235 probability profile of each trial experienced by participants with respect to the chosen target, as  
236 well as their decision success probability (SP) at the time of commitment time (figure 1C), using  
237 Equation 1. For instance, for a total of 15 tokens, if at a particular moment in time the target chosen  
238 by the subject contains  $N_{\text{chosen}}$  tokens, whereas the other target contains  $N_{\text{other}}$  tokens, and there are  
239  $N_C$  tokens remaining in the center, then the probability that the chosen target will ultimately be the  
240 correct one, i.e. the subject's success probability (SP) at a particular time is as follows:

$$p(\text{Chosen} | N_{\text{chosen}}, N_{\text{other}}, N_C) = \frac{N_C!}{2^{N_C}} \sum_{k=0}^{\min(N_C, 7 - N_{\text{other}})} \frac{1}{k! (N_C - k)!} \quad (1)$$

241 To ensure that the difficulty of decisions was homogeneous among subjects and experimental  
242 conditions, we controlled the sequence of trials experienced by each participant in each session of  
243 both tasks. Especially, we interspersed among fully random trials (~20% of the trials in which each  
244 token is 50% likely to jump into the right or the left lateral circle) three special types of trials, easy,  
245 ambiguous and misleading, characterized by particular temporal profiles of success probability.  
246 Subjects were not told about the existence of these trials. Please refer to Reynaud et al., 2020 and  
247 Saleri Lunazzi et al., 2021 for a detailed description of these trial types and their proportions in the  
248 FMD and CMD tasks.

249 To assess the impact of the outcome of each trial  $i$  on the decision and motor behavior of trial  $i+1$ ,  
250 we calculated the difference of movement velocity peak ( $\Delta VP$ ), duration ( $\Delta MD$ ), amplitude  
251 ( $\Delta Amp$ ), accuracy ( $\Delta CED$ ), and the difference of decision duration ( $\Delta DD$ ) and success probability

252 ( $\Delta SP$ ) between them (e.g.  $\Delta VP = VP_{i+1} - VP_i$ ). We then calculated for each subject the average  
253 of each variable with respect to trial  $i$  outcome.

254 Statistics

255 To determine whether the behavioral adjustment from one trial to the following ( $\Delta VP$ ,  $\Delta MD$ ,  
256  $\Delta Amp$ ,  $\Delta CED$ ,  $\Delta DD$  and  $\Delta SP$ ) differs significantly from 0 in the different outcome conditions at  
257 the population level, we used one-sample Wilcoxon signed rank tests. The Levene's test is used to  
258 test if the distributions of the post-correct and post-error decision and motor variables have equal  
259 variances. To directly investigate the relationship between motor ( $\Delta VP$ ,  $\Delta MD$ ,  $\Delta Amp$ ,  $\Delta CED$ ) and  
260 decision ( $\Delta DD$ ,  $\Delta SP$ ) adjustments following different outcomes, Pearson's correlation tests were  
261 used. For all statistical tests, the significance level is set to 0.05. Unless stated otherwise, data are  
262 reported as medians across the population. To estimate the difference between the average success  
263 probability profiles of two trial subsets (e.g. correct decision trials versus post-correct decision  
264 trials), we computed the distance between the two profiles (1 and 2) from token jump ( $j$ ) #1 to #15  
265 as the following chi-squared metric:

$$\chi^2 = \sum_{j=1}^{15} \frac{(y_{1,j} - y_{2,j})^2}{\sigma_j^2}, \quad (2)$$

266 where  $y_1$  and  $y_2$  are the two SP profiles, averaged across subjects, and  $\sigma_j^2$  is the mean squared  
267 variance of the SP profiles, such as  $\sigma_j^2 = \frac{1}{2}(\sigma_{1,j}^2 + \sigma_{2,j}^2)$ .

## 268 Results

269 Effect of a decision on the next decision and motor behaviors in the FMD task

270 We first describe the impact of the decision outcome (correct or incorrect choice) on participants'  
271 subsequent decisional behavior when the motor temporal constraints were low (FMD task). As  
272 shown in figure 2A, subjects' decision duration was significantly increased compared to a previous  
273 incorrect decision (median  $\Delta DD = +70.6$  ms, Wilcoxon signed rank test,  $Z = 2.4$ ,  $p = 0.015$ ). This  
274 slowdown of decision-making was observed despite that trials following an incorrect choice were  
275 easier, as can be seen on the averaged success probability (SP) profiles of the two trial subsets  
276 ( $\chi^2 = 2119$ , inset in figure 2A, top right panel; Suppl. figure 1 illustrates the SP profiles of the same  
277 trials computed with respect to the correct target). As a consequence, subjects' SPs at decision  
278 time were increased following incorrect decisions ( $\Delta SP = +0.09$ ,  $Z = 3.9$ ,  $p < 0.001$ ). By contrast, no  
279 significant difference of decision duration ( $\Delta DD = -2.8$  ms) was observed following a correct  
280 decision. Together, this first analysis demonstrates that most subjects used a post-error slowing  
281 strategy to decide in this task, as can be seen when decision durations following either a correct or  
282 a bad choice are directly compared (suppl. figure 2). Interestingly, subjects did not adjust their  
283 decision duration following a correct trial despite that these trials were on average slightly more  
284 difficult ( $\chi^2 = 207$ , inset in figure 2A, bottom right panel). Participants' success probability thus  
285 slightly decreased after a correct choice ( $\Delta SP = -0.02$ ,  $Z = -3.9$ ,  $p < 0.001$ ), indicating that they  
286 committed to a decision with less sensory evidence after a correct trial.

287

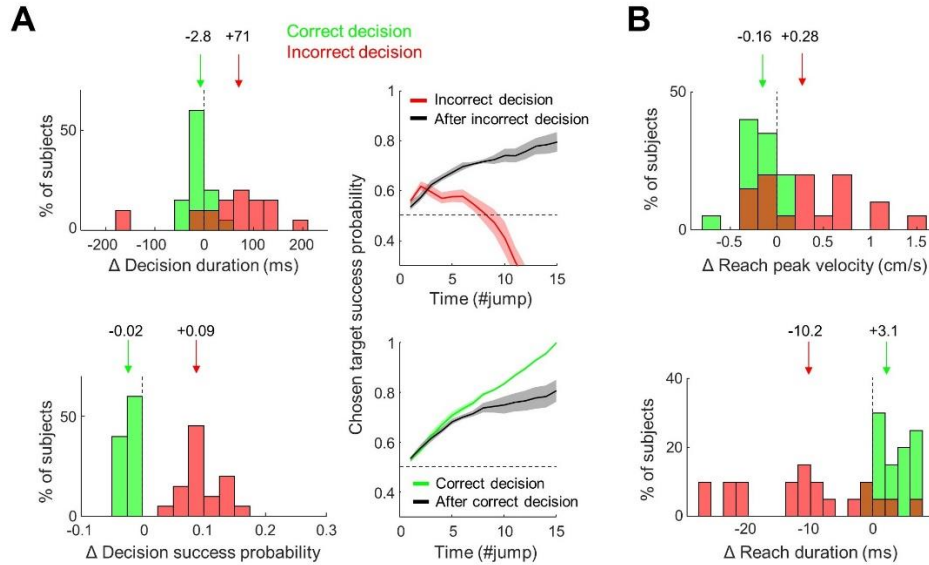

288

289 **Figure 2. Effect of a decision outcome on the subsequent decision and motor behaviors in the FMD**  
 290 **task.** A. Left panels: Distribution and comparison of decision duration (top) and success probability  
 291 (bottom) adjustments depending on the decision outcome of the previous trial (after a correct trial in green  
 292 and after an incorrect decision in red). Arrows mark the population medians whose values are reported  
 293 above. The dotted black line indicates zero difference between the trial  $i$  and  $i+1$ . If  $\Delta$  is positive, there is a  
 294 post-outcome increase for a given metric  $X$  ( $X_{i+1} - X_i > 0$ ) whereas a negative  $\Delta$  value indicates a decrease  
 295 of that metric. Right panel, top: Comparison of the average  $\pm$  SD success probability profiles between trials  
 296 whose decision was incorrect (red solid line) and trials following an incorrect choice (black dotted line),  
 297 computed across subjects with respect to the target they chose. Right panel, bottom: same comparison  
 298 between correct decision trials (green solid line) and trials following a correct decision (black solid line).  
 299 B: Same analysis as in A, left panels, for the post-decision outcome adjustments computed for movement  
 300 peak velocity (top) and duration (bottom).

301

302 We next investigate whether or not decision outcomes impact motor behavior as well. We found  
 303 that following incorrect decisions, subjects made overall faster movements ( $\Delta VP = +0.28$  cm/s,  
 304  $Z = 2.4$ ,  $p = 0.01$ ), thus reducing their reaching duration ( $\Delta MD = -10.2$  ms,  $Z = 3.5$ ,  $p < 0.001$ , figure 2B)  
 305 despite a decrease of amplitude ( $\Delta Amp = -0.08$  cm,  $Z = -3$ ,  $p = 0.002$ , suppl. figure 3). We also  
 306 observed at the population level an increase of movement inaccuracy after an incorrect choice  
 307 ( $\Delta CED = +0.06$  cm,  $Z = 3.1$ ,  $p = 0.002$ ), but this effect was also observed for trials following correct  
 308 decisions ( $\Delta CED = +0.06$  cm,  $Z = 3.9$ ,  $p < 0.001$ , suppl. figure 3).

309 Effect of a movement on the next decision and motor behaviors in the FMD task

310 In the free-movement duration (FMD) task, we distinguished two types of movement error:  
311 “Inaccurate” trials, when a target was reached but subjects failed to stop in it, and “unreached”  
312 trials, when the subject failed to reach a target before the movement duration deadline (800 ms in  
313 the FMD task). “Inaccurate” movements were thus on average faster (26.8 vs 26 cm/s), larger in  
314 amplitude (9.2 vs 8.7 cm) and longer (557 vs 530 ms) compared to correct movements (figure 1D,  
315 top right panel). As expected, subjects corrected these inaccurate movements in the following trial  
316 ( $\Delta\text{CED}=-0.19$  cm,  $Z=-2.6$ ,  $p=0.01$ ) by decreasing their reaching velocity peak ( $\Delta\text{VP}=-1.7$  cm/s,  
317  $p=0.001$ ,  $Z=-3.2$ , figure 3A, top panels). Participants also reduced their movement amplitude  
318 ( $\Delta\text{Amp}=-1.1$  cm,  $Z=-3.9$ ,  $p<0.001$ ) and duration ( $\Delta\text{MD}=-40$  ms,  $Z=-3$ ;  $p=0.002$ ) in trials following  
319 an inaccurate movement (suppl. figure 4A).

320 As illustrated in the bottom panels of figure 3A, population mean decision durations and success  
321 probabilities are much variable and distributed across the population in trials following an  
322 inaccurate movement compared to trials following a correct movement (SD=182 versus 4.6 ms,  
323 respectively; Levene’s test,  $F=21.7$ ,  $p<0.0001$ ). In terms of medians, decision durations following  
324 an inaccurate movement were overall shorter compared to trials for which a movement was  
325 inaccurate, but this difference is not significant ( $\Delta\text{DD}=-39$  ms). We also observed a slight but  
326 significant increase of decision success probability ( $\Delta\text{SP}=+0.04$ ,  $Z=2.8$ ,  $p=0.005$ ) following  
327 inaccurate movements, possibly because of the slightly higher SP profile of trials following  
328 inaccurate movements compared to the error movement trials ( $\chi^2=21.8$ , figure 3A, bottom right  
329 panel). To directly assess the relationship between motor and decision adjustments due to  
330 inaccurate movements, we computed linear regressions between all differences of motor ( $\Delta\text{VP}$ ,  
331  $\Delta\text{MD}$ ,  $\Delta\text{CED}$ ,  $\Delta\text{Amp}$ ) and decision ( $\Delta\text{DD}$ ,  $\Delta\text{SP}$ ) metrics. We found a significant negative  
332 correlation between  $\Delta\text{MD}$  and  $\Delta\text{DD}$  (Pearson correlation,  $R=-0.62$ ,  $p=0.003$ ) and a significant

333 positive correlation between  $\Delta MD$  and  $\Delta SP$  ( $R=0.66$ ,  $p=0.003$ ), indicating that subjects who  
 334 decreased their subsequent reaching duration the most after an inaccurate movement increased  
 335 their subsequent decision duration and decrease their subsequent decision success probability the  
 336 most as well (suppl. figure 4B).

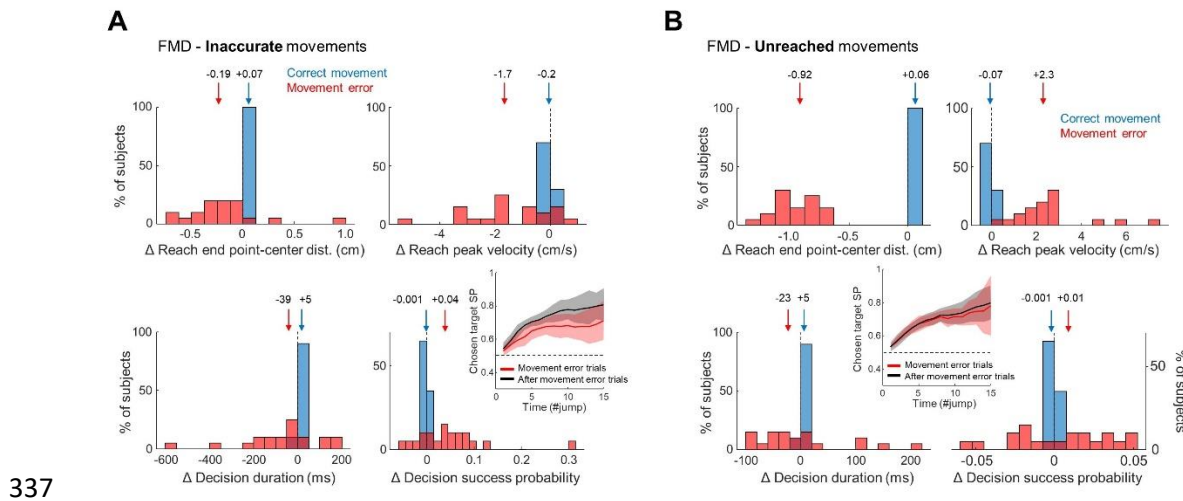

337 **Figure 3. Effect of movement errors on subsequent motor and decision behaviors in the FMD task.**  
 338 A. Top: Distribution and comparison of reaching movement end-point center distance (left) and peak  
 339 velocity (right) adjustments depending on the movement outcome in the previous trial (after a correct  
 340 movement in blue and after an “inaccurate” movement in red). Bottom: Distribution and comparison of  
 341 decision duration (left) and success probability (right) adjustments depending on the movement outcome in  
 342 the previous trial (after a correct movement in blue and after an “inaccurate” movement in red). The inset  
 343 illustrates the average  $\pm$  SD success probability profiles of inaccurate movement trials (red) and post-  
 344 inaccurate movement trials (black), computed across subjects. B. Same as A for the “unreached” trials.

346 While various reasons could lead to “unreached” trials, we noticed that overall, movements in  
 347 these trials were on average slower compared to correct movements (figure 1D, top left panel).  
 348 Following these unreached trials, subjects significantly increased their movement accuracy in the  
 349 next trial ( $\Delta CED=-0.92$  cm,  $Z=-3.9$ ,  $p<0.001$ ) by increasing their reaching velocity peak  
 350 ( $\Delta VP=+2.3$  cm/s,  $Z=3.9$ ,  $p<0.001$ , figure 3B, top panels). They also increased their reaching  
 351 amplitude ( $\Delta Amp=+1$  cm,  $Z=3.9$ ,  $p<0.001$ ) and duration ( $\Delta MD=+20$  ms,  $Z=2.9$ ,  $p=0.004$ )  
 352 compared to the previous erroneous trials (suppl. figure 4C).



354 After an “unreached” movement, we did not observe significant adjustments of the decisional  
355 behavior in the next trial at the population level ( $\Delta DD = -23$  ms,  $\Delta SP = +0.01$ ), although distributions  
356 of mean decision durations and success probabilities are broader in trials following an unreached  
357 movement compared to trials following a correct movement ( $SD = 83$  versus  $4.6$  ms; Levene’s test,  
358  $F = 25$ ,  $p < 0.0001$  figure 3B, bottom panels). We found however a significant positive correlation  
359 between the adjustment of peak velocities ( $\Delta VP$ ) following an unreached movement trial and the  
360 adjustment of decision durations ( $\Delta DD$ ) in the same condition ( $R = 0.48$ ,  $p = 0.04$ , suppl. figure 4D),  
361 indicating that participants who increased their movement speed the most after an unreached  
362 movement trial also increased their decision duration the most.

### 363 Post-outcome adjustments of decision and motor behaviors in the CMD task

364 The previous paragraphs describe behavioral adjustments of subjects performing the free-  
365 movement duration (FMD) task. In the following lines, we report the same analyses applied on a  
366 dataset collected in the constrained movement duration (CMD) task. In this task, the duration of a  
367 movement executed to report a choice was strictly bounded (see methods), increasing the difficulty  
368 of the motor aspect of the task. In the FMD task, the average error percentage was 25%, among  
369 which 18% of decisional errors and 7% of movement errors. In the CMD task however, the average  
370 error percentage was 50%, with only 12% of decisional errors but 38% of movement errors.

371 We first assessed whether a decision outcome influenced the subsequent decision behavior in the  
372 CMD task. As shown in figure 4A, the slowdown of decisions observed following incorrect  
373 choices in the FMD task was not found in the CMD task ( $\Delta DD = -5$  ms). Subsequent decision  
374 success probabilities were increased following incorrect decisions ( $\Delta SP = +0.12$ ,  $Z = 4.8$ ,  $p < 0.001$ ),  
375 an adjustment likely due to post-incorrect decision trials that were easier compared to incorrect  
376 decision trials ( $\chi^2 = 767$ , inset in figure 4A, right panel). Despite that decision outcomes did not

377 influence the next decision in the CMD task, we observed that following incorrect choices,  
 378 participants increased their reaching velocity peak ( $\Delta VP = +0.24$  cm/s,  $Z = 3$ ,  $p = 0.003$ ), leading to a  
 379 decrease of movement duration ( $\Delta MD = -13$  ms,  $Z = -3.4$ ,  $p < 0.001$ , figure 4B).

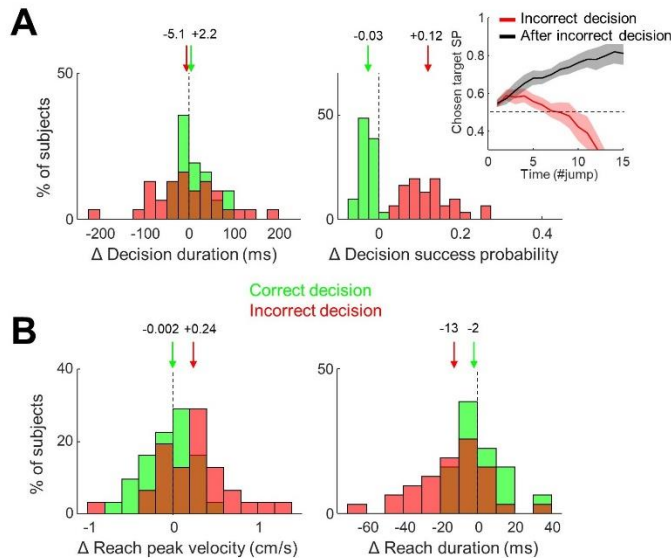

**Figure 4. Effect of decision outcomes on subsequent decision and motor behaviors in the CMD task.** A. Distribution and comparison of decision duration (left) and success probability (right) adjustments depending on the decision outcome in the previous trial (after a correct decision in green and after an error decision in red). The inset illustrates the average  $\pm$  SD success probability profiles of incorrect decision trials (red) and post-incorrect decision trials (black), computed across subjects. B: Distribution and comparison of reaching peak velocity (left) and duration (right) adjustments depending on the decision outcome in the previous trial (same conventions as in A).

396

397 In the last two paragraphs, we investigate the consequences of a movement error outcome in the  
 398 CMD task, i.e. too fast or too slow movements, on subjects' behavior in the next trial. As expected,  
 399 following too fast movements, participants significantly decreased their reaching velocity peak  
 400 ( $\Delta VP = -3.1$  cm/s,  $Z = -4.8$ ,  $p < 0.001$ ), leading to an increase of movement duration ( $\Delta MD = +62$  ms,  
 401  $Z = 4.8$ ,  $p < 0.001$ , figure 5A, top panels). This adjustment was accompanied by a decrease of  
 402 amplitude ( $\Delta Amp = -0.35$  cm,  $Z = -4.8$ ,  $p < 0.001$ ) and a decrease of accuracy ( $\Delta CED = +0.2$  cm,  
 403  $Z = 4.8$ ,  $p < 0.001$ , suppl. figure 5A). The duration of decisions at the population level was  
 404 significantly decreased following too fast movements in the CMD task ( $\Delta DD = -79$  ms,  $Z = -3.7$ ,  
 405  $p < 0.001$ , figure 5A, bottom left panel). Crucially, this adjustment is not due to a difference of  
 406 decision difficulty between the two trial subsets ( $\chi^2 = 1.2$ , inset in figure 5A, bottom right panel),

407 and no variation of decision success probability (SP) was observed following too fast movement  
 408 trials.

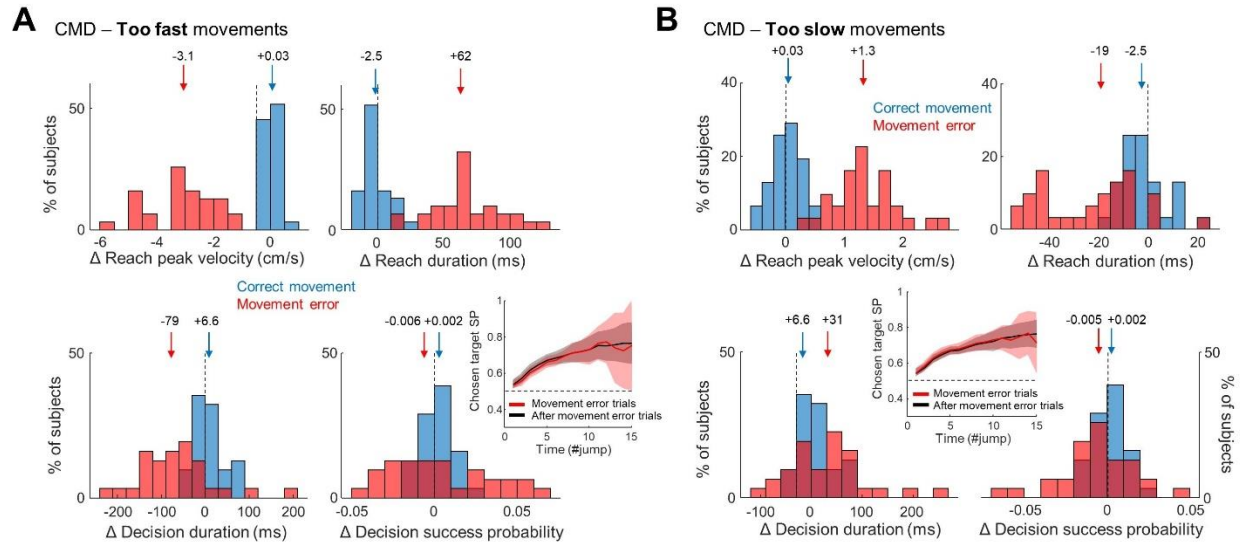

409

410 **Figure 5. Effect of movement errors on subsequent motor and decision behaviors in the CMD task.**  
 411 A. Top: Distribution and comparison of reaching movement peak velocity (left) and duration (right)  
 412 adjustments depending on the movement outcome in the previous trial (after a correct movement in blue  
 413 and after a too fast movement in red). Bottom: Distribution and comparison of decision duration (left)  
 414 and success probability (right) adjustments depending on the movement outcome in the previous trial (same  
 415 convention as above). The inset illustrates the average  $\pm$  SD success probability profiles of too fast  
 416 movement trials (red) and post-too fast movement trials (black), computed across subjects. B. Same as A  
 417 for too slow movement trials in the CMD task.

418

419 After too slow movements, participants unsurprisingly increased their movement velocity peak  
 420 ( $\Delta VP = +1.3$  cm/s,  $Z = 4.8$ ,  $p < 0.001$ ), which reduced reaching durations ( $\Delta MD = -19$  ms,  $Z = -4.4$ ,  
 421  $p < 0.001$ , figure 5B, top panels). Movement amplitude ( $\Delta Amp = +0.3$  cm,  $Z = 4.8$ ,  $p < 0.001$ ) and  
 422 accuracy ( $\Delta CED = -0.29$  cm,  $Z = -4.8$ ,  $p < 0.001$ ) were also significantly increased (suppl. figure 5B).  
 423 Notably, following too slow movements, the duration of decisions was in this case significantly  
 424 increased ( $\Delta DD = +31$  ms,  $Z = 2.1$ ,  $p = 0.038$ ), despite no difference between the SP profiles in the  
 425 tow trial subsets ( $\chi^2 = 0.5$ ), without a significant modulation of decision SP (figure 5B, bottom  
 426 panels).

## 427 Discussion

428 In the present study we first observed that in the free-movement duration (FMD) task, most  
429 subjects slowed down their choices following a decision error. Post-(decision) error slowing (PES)  
430 is a phenomenon commonly reported in the literature (Danielmeier & Ullsperger, 2011; Jentsch  
431 & Dudschig, 2009; Laming, 1979; Purcell & Kiani, 2016; Rabbitt & Rodgers, 1977; Thura et al.,  
432 2017), even if post-error speeding has been described as well (e.g. King et al., 2010). PES is often  
433 interpreted as an error-induced increase in response caution that allows one to improve subsequent  
434 performance. Interestingly, after a correct choice, subjects did not adjust their choice durations,  
435 but they committed with less sensory evidence. Because post-correct decision trials were slightly  
436 more difficult than correct trials, this result suggests that a successful behavior increased  
437 participants' confidence, possibly promoting risk taking during upcoming trials (Bandura &  
438 Locke, 2003).

439 The present report reveals the properties of the decision-related PES further by showing that  
440 participants did not adjust their decision duration following a bad decision in the constrained-  
441 movement duration (CMD) task. To explain this observation, it could first be argued that post-  
442 decision error trials were overall easier compared to trials in which a decision error occurred.  
443 Although possible, the difference of success probability profiles in the two trial subsets was similar  
444 in the FMD and CMD tasks, suggesting another reason for the lack of PES in the CMD task.  
445 Alternatively, it is known that PES partly depends on error frequency (Notebaert et al., 2009), and  
446 participants made more errors in the CMD task compared to the FMD task. However, errors in the  
447 CMD task concerned mostly movements, and decision error rates were similar in the two tasks.  
448 We thus believe that the lack of decision-related PES in the CMD task mainly relates to the strict  
449 duration constraints imposed on movements in this task (see below).

450 We also observed the expected, yet very robust, post-movement error adjustments in participants'  
451 motor behavior. Generally, effects of behavior history on subsequent behavior have been  
452 investigated by means of cognitive tasks (Dutilh et al., 2012; Notebaert et al., 2009; Rabbitt &  
453 Rodgers, 1977), limiting the analysis to pre-movement processes (but see Ceccarini & Castiello,  
454 2018). The present report describes, to our knowledge, the first analysis addressing the impact of  
455 decision *and* action outcomes on *both* the decision and action executed in the following trial. This  
456 is important because in most everyday life choices, decisions and movements expressing these  
457 choices are temporally linked, constituting a continuum separating an event from a potential  
458 reward (Cisek, 2007).

459 We found that after a slower choice made in response to a decision error, movement duration, if  
460 unconstrained, is reduced. This result is consistent with recent reports in both human and non-  
461 human primates showing that within blocks of trials defined by specific speed-accuracy tradeoff  
462 (SAT) properties, long decisions are expressed with vigorous, short movements (Thura, 2020;  
463 Thura et al., 2014). We show here that this policy can be established on a shorter time scale, from  
464 trial to trial, based on subject's previous trial outcomes.

465 Conversely, we found that when participants had to correct a bad movement, they not only  
466 adequately adjusted their movements in the following trial, but they also altered the decision made  
467 in this following trial, prior to the corrected movement expressing that choice. This observation is  
468 at first sight consistent with several studies showing that the cost of a movement executed to report  
469 a choice influences that choice in a given trial (Burk et al., 2014; Hagura et al., 2017; Marcos et  
470 al., 2015). But it actually differs by demonstrating for the first time the capacity of humans to  
471 preemptively compensate for a movement correction due to a motor error by altering the  
472 deliberation process of the post-error trial, before the execution of the corrected movement.

473 A possible functional interpretation of the reduction of movement duration accompanying a  
474 decision-related PES (in the FMD task) is that subjects aimed at compensating the extra time  
475 devoted to deliberation by executing faster movements, even if shortening movement duration  
476 usually leads to a slight decrease of accuracy. In ecological scenarios, individuals are often free to  
477 adjust the time they invest in deciding versus moving, and movements are parametrized following  
478 “economic” rules (e.g. Shadmehr et al., 2019), allowing to optimize what matters the most for  
479 individuals during successive choices, the rate of reward (Balci et al., 2011; Bogacz et al., 2010;  
480 Carland et al., 2019).

481 In agreement with a reward rate maximization account, when a movement was corrected by  
482 increasing or decreasing its duration, most participants decreased or increased their decision  
483 duration, respectively, within the same trial. This is consistent with our previous reports in which  
484 compensatory effects are described across blocks of tens of trials defined by specific motor SAT  
485 constraints (Reynaud et al., 2020; Saleri Lunazzi et al., 2021). This suggests that one can flexibly  
486 share temporal resources between the decision and the action processes depending on both global  
487 and local contexts, even if these processes must slightly suffer in terms of accuracy (i.e. a good  
488 enough, or heuristic, approach, Gigerenzer & Gaissmaier, 2011). According to this mechanism,  
489 the absence of decision-related PES when movement duration was strictly bounded would mean  
490 that subjects anticipated that they could not compensate for a potential extension of their decision  
491 duration following a bad choice during the movement phase, discouraging them to slow down their  
492 decisions after a decision error. Intriguingly, they still produced faster and shorter movements after  
493 a bad choice, indicating here an adjustment of movement duration that does not depend on the  
494 decision determining this movement. It is possible that in this specific task where errors were

495 frequent (~50%), subjects aimed at limiting the waste of time due an erroneous trial by moving  
496 slightly faster in the next trial despite the strict constraints imposed on movement duration.

497 Taken together, the present results indicate that following both decision and movement errors,  
498 humans are primarily concerned about determining a behavioral duration as a whole instead of  
499 optimizing each of the decision and action speed-accuracy trade-offs independently of each other,  
500 probably with the goal of maximizing their success rate.

### 501 [Open practices statement](#)

502 The data and materials for the two experiments are available upon request. None of the experiments  
503 was preregistered.

### 504 [References](#)

- 505 Balci, F., Simen, P., Niyogi, R., Saxe, A., Hughes, J. A., Holmes, P., & Cohen, J. D. (2011).  
506 Acquisition of decision making criteria: Reward rate ultimately beats accuracy. *Attention,*  
507 *Perception, & Psychophysics*, 73(2), 640–657. [https://doi.org/10.3758/s13414-010-0049-](https://doi.org/10.3758/s13414-010-0049-7)  
508 [7](https://doi.org/10.3758/s13414-010-0049-7)
- 509 Bandura, A., & Locke, E. A. (2003). Negative self-efficacy and goal effects revisited. *Journal of*  
510 *Applied Psychology*, 88(1), 87–99. <https://doi.org/10.1037/0021-9010.88.1.87>
- 511 Bogacz, R., Hu, P. T., Holmes, P. J., & Cohen, J. D. (2010). Do humans produce the speed–  
512 accuracy trade-off that maximizes reward rate? *Quarterly Journal of Experimental*  
513 *Psychology*, 63(5), 863–891. <https://doi.org/10.1080/17470210903091643>
- 514 Burk, D., Ingram, J. N., Franklin, D. W., Shadlen, M. N., & Wolpert, D. M. (2014). Motor Effort  
515 Alters Changes of Mind in Sensorimotor Decision Making. *PLoS ONE*, 9(3), e92681.  
516 <https://doi.org/10.1371/journal.pone.0092681>

- 517 Carland, M. A., Thura, D., & Cisek, P. (2019). The Urge to Decide and Act: Implications for  
518 Brain Function and Dysfunction. *The Neuroscientist*, 107385841984155.  
519 <https://doi.org/10.1177/1073858419841553>
- 520 Ceccarini, F., & Castiello, U. (2018). The grasping side of post-error slowing. *Cognition*, 179, 1–  
521 13. <https://doi.org/10.1016/j.cognition.2018.05.026>
- 522 Choi, J. E. S., Vaswani, P. A., & Shadmehr, R. (2014). Vigor of Movements and the Cost of  
523 Time in Decision Making. *Journal of Neuroscience*, 34(4), 1212–1223.  
524 <https://doi.org/10.1523/JNEUROSCI.2798-13.2014>
- 525 Cisek, P. (2007). Cortical mechanisms of action selection: The affordance competition  
526 hypothesis. *Philosophical Transactions of the Royal Society B: Biological Sciences*,  
527 362(1485), 1585–1599. <https://doi.org/10.1098/rstb.2007.2054>
- 528 Cos, I., Bélanger, N., & Cisek, P. (2011). The influence of predicted arm biomechanics on  
529 decision making. *Journal of Neurophysiology*, 105(6), 3022–3033.  
530 <https://doi.org/10.1152/jn.00975.2010>
- 531 Danielmeier, C., & Ullsperger, M. (2011). Post-Error Adjustments. *Frontiers in Psychology*, 2,  
532 233. <https://doi.org/10.3389/fpsyg.2011.00233>
- 533 Dutilh, G., Vandekerckhove, J., Forstmann, B. U., Keuleers, E., Brysbaert, M., & Wagenmakers,  
534 E.-J. (2012). Testing theories of post-error slowing. *Attention, Perception &*  
535 *Psychophysics*, 74(2), 454–465. <https://doi.org/10.3758/s13414-011-0243-2>
- 536 Fievez, F., Derosiere, G., Verbruggen, F., & Duque, J. (2021). *Post-error slowing reflects the*  
537 *joint impact of adaptive and maladaptive processes during decision making* [Preprint].  
538 *Neuroscience*. <https://doi.org/10.1101/2021.12.22.473805>



- 539 Franklin, D. W., & Wolpert, D. M. (2011). Computational mechanisms of sensorimotor control.  
540 *Neuron*, 72(3), 425–442. <https://doi.org/10.1016/j.neuron.2011.10.006>
- 541 Gigerenzer, G., & Gaissmaier, W. (2011). Heuristic Decision Making. *Annual Review of*  
542 *Psychology*, 62(1), 451–482. <https://doi.org/10.1146/annurev-psych-120709-145346>
- 543 Hagura, N., Haggard, P., & Diedrichsen, J. (2017). Perceptual decisions are biased by the cost to  
544 act. *ELife*, 6, e18422. <https://doi.org/10.7554/eLife.18422>
- 545 Haith, A. M., Reppert, T. R., & Shadmehr, R. (2012). Evidence for Hyperbolic Temporal  
546 Discounting of Reward in Control of Movements. *Journal of Neuroscience*, 32(34),  
547 11727–11736. <https://doi.org/10.1523/JNEUROSCI.0424-12.2012>
- 548 Jentzsch, I., & Dudschig, C. (2009). Short Article: Why do we slow down after an error?  
549 Mechanisms underlying the effects of posterror slowing. *Quarterly Journal of*  
550 *Experimental Psychology*, 62(2), 209–218. <https://doi.org/10.1080/17470210802240655>
- 551 King, J. A., Korb, F. M., von Cramon, D. Y., & Ullsperger, M. (2010). Post-error behavioral  
552 adjustments are facilitated by activation and suppression of task-relevant and task-  
553 irrelevant information processing. *The Journal of Neuroscience: The Official Journal of*  
554 *the Society for Neuroscience*, 30(38), 12759–12769.  
555 <https://doi.org/10.1523/JNEUROSCI.3274-10.2010>
- 556 Laming, D. (1979). Choice reaction performance following an error. *Acta Psychologica*, 43(3),  
557 199–224. [https://doi.org/10.1016/0001-6918\(79\)90026-X](https://doi.org/10.1016/0001-6918(79)90026-X)
- 558 Marcos, E., Cos, I., Girard, B., & Verschure, P. F. M. J. (2015). Motor Cost Influences  
559 Perceptual Decisions. *PLOS ONE*, 10(12), e0144841.  
560 <https://doi.org/10.1371/journal.pone.0144841>

- 561 Morel, P., Ulbrich, P., & Gail, A. (2017). What makes a reach movement effortful? Physical  
562 effort discounting supports common minimization principles in decision making and  
563 motor control. *PLOS Biology*, *15*(6), e2001323.  
564 <https://doi.org/10.1371/journal.pbio.2001323>
- 565 Notebaert, W., Houtman, F., Opstal, F. V., Gevers, W., Fias, W., & Verguts, T. (2009). Post-  
566 error slowing: An orienting account. *Cognition*, *111*(2), 275–279.  
567 <https://doi.org/10.1016/j.cognition.2009.02.002>
- 568 Purcell, B. A., & Kiani, R. (2016). Neural Mechanisms of Post-error Adjustments of Decision  
569 Policy in Parietal Cortex. *Neuron*, *89*(3), 658–671.  
570 <https://doi.org/10.1016/j.neuron.2015.12.027>
- 571 Rabbitt, P., & Rodgers, B. (1977). What does a man do after he makes an error? An analysis of  
572 response programming. *Quarterly Journal of Experimental Psychology*, *29*(4), 727–743.  
573 <https://doi.org/10.1080/14640747708400645>
- 574 Ratcliff, R., Smith, P. L., Brown, S. D., & McKoon, G. (2016). Diffusion Decision Model:  
575 Current Issues and History. *Trends in Cognitive Sciences*, *20*(4), 260–281.  
576 <https://doi.org/10.1016/j.tics.2016.01.007>
- 577 Reynaud, A. J., Saleri Lunazzi, C., & Thura, D. (2020). Humans sacrifice decision-making for  
578 action execution when a demanding control of movement is required. *Journal of*  
579 *Neurophysiology*, *124*(2), 497–509. <https://doi.org/10.1152/jn.00220.2020>
- 580 Saleri Lunazzi, C., Reynaud, A. J., & Thura, D. (2021). Dissociating the Impact of Movement  
581 Time and Energy Costs on Decision-Making and Action Initiation in Humans. *Frontiers*  
582 *in Human Neuroscience*, *15*, 715212. <https://doi.org/10.3389/fnhum.2021.715212>

- 583 Shadmehr, R., & Ahmed, A. A. (2020). *Vigor: Neuroeconomics of Movement Control*. The MIT  
584 Press. <https://doi.org/10.7551/mitpress/12940.001.0001>
- 585 Shadmehr, R., Orban de Xivry, J. J., Xu-Wilson, M., & Shih, T.-Y. (2010). Temporal  
586 Discounting of Reward and the Cost of Time in Motor Control. *Journal of Neuroscience*,  
587 *30*(31), 10507–10516. <https://doi.org/10.1523/JNEUROSCI.1343-10.2010>
- 588 Shadmehr, R., Reppert, T. R., Summerside, E. M., Yoon, T., & Ahmed, A. A. (2019). Movement  
589 Vigor as a Reflection of Subjective Economic Utility. *Trends in Neurosciences*, *42*(5),  
590 323–336. <https://doi.org/10.1016/j.tins.2019.02.003>
- 591 Thura, D. (2020). Decision urgency invigorates movement in humans. *Behavioural Brain*  
592 *Research*, *382*, 112477. <https://doi.org/10.1016/j.bbr.2020.112477>
- 593 Thura, D. (2021). Reducing behavioral dimensions to study brain–environment interactions.  
594 *Behavioral and Brain Sciences*, *44*. <https://doi.org/10.1017/S0140525X21000169>
- 595 Thura, D., Cos, I., Trung, J., & Cisek, P. (2014). Context-dependent urgency influences speed-  
596 accuracy trade-offs in decision-making and movement execution. *The Journal of*  
597 *Neuroscience: The Official Journal of the Society for Neuroscience*, *34*(49), 16442–  
598 16454. <https://doi.org/10.1523/JNEUROSCI.0162-14.2014>
- 599 Thura, D., Guberman, G., & Cisek, P. (2017). Trial-to-trial adjustments of speed-accuracy trade-  
600 offs in premotor and primary motor cortex. *Journal of Neurophysiology*, *117*(2), 665–  
601 683. <https://doi.org/10.1152/jn.00726.2016>
- 602 Urai, A. E., de Gee, J. W., Tsetsos, K., & Donner, T. H. (2019). Choice history biases subsequent  
603 evidence accumulation. *ELife*, *8*, e46331. <https://doi.org/10.7554/eLife.46331>

604 Yoon, T., Geary, R. B., Ahmed, A. A., & Shadmehr, R. (2018). Control of movement vigor and  
605 decision making during foraging. *Proceedings of the National Academy of Sciences*,  
606 *115*(44), E10476–E10485. <https://doi.org/10.1073/pnas.1812979115>  
607
