# Impact of decision and action outcomes on subsequent decision and action behaviors

Clara SALERI LUNAZZI, David THURA\* and Amélie J. REYNAUD\*

Lyon Neuroscience Research Center – Impact team  
Inserm U1028 – CNRS UMR5292 – Lyon 1 University

\* Equal contribution to the work

## *Running Head:*

Decision and action influence subsequent decision and action behaviors

## *Corresponding author information:*

David Thura

Lyon Neuroscience Research Center – Impact team  
Inserm U1028 – CNRS UMR5292 – Lyon 1 University  
16 avenue du Doyen Jean Lépine, 69675 Bron, France  
E-mail: david.thura@inserm.fr

## *Manuscript information:*

Abstract: 249 words; Introduction, Methods and Discussion: 3094 words

28 pages – 5 figures

## *Keywords:*

decision-making, motor control, reward rate, post-outcome adjustment, arm movement

## *Acknowledgements/Funding:*

The authors have no financial or non-financial interests to declare

This work is supported by a CNRS/Inserm ATIP/Avenir grant to David Thura

## 33 Abstract

34 Speed-accuracy tradeoff adjustments in decision-making have been mainly studied separately  
35 from those in motor control. In the wild however, animals coordinate their decision and action,  
36 freely investing time in choosing versus moving given specific contexts. Recent behavioral  
37 studies support this view, indicating that humans trade decision time for movement time to  
38 maximize their global rate of reward during experimental sessions. Besides, it is established that  
39 choice outcomes impact subsequent decisions. Crucially though, whether and how a decision  
40 also influences the subsequent motor behavior, and whether and how a motor error influences the  
41 next decision is unknown. Here we address these questions by analyzing trial-to-trial changes of  
42 choice and motor behaviors in healthy human participants instructed to perform successive  
43 perceptual decisions expressed with reaching movements whose duration was either bounded or  
44 unconstrained in separate tasks. Results indicate that after a bad decision, subjects who were not  
45 constrained in their action duration decided more slowly and more accurately. Interestingly, they  
46 also shortened their subsequent movement duration by moving faster. Conversely, we found that  
47 movement errors not only influenced the speed and the accuracy of the following movement, but  
48 those of the decision as well. If the movement had to be slowed down, the decision that precedes  
49 that movement was accelerated, and vice versa. Together, these results indicate that from one  
50 trial to the next, humans are primarily concerned about determining a behavioral duration as a  
51 whole instead of optimizing each of the decision and action speed-accuracy trade-offs  
52 independently of each other.

## 53 Introduction

54 Choosing one action among several options and executing that action are usually considered as  
55 two distinct functions, most often studied separately from each other (e.g. Franklin & Wolpert,  
56 2011; Ratcliff et al., 2016). However, recent behavioral studies indicate that decision and action  
57 show a high level of integration during goal-oriented behavior (Choi et al., 2014; Cos et al.,  
58 2011; Haith et al., 2012; Morel et al., 2017; Shadmehr et al., 2010, 2019; Shadmehr & Ahmed,  
59 2020; Yoon et al., 2018). For example, human subjects decide faster and less accurately to focus  
60 on their actions when the motor context in which a choice is made is demanding (Reynaud et al.,  
61 2020). Similarly, when the temporal cost of a movement is significantly larger than usual,  
62 humans often reduce the duration of their decisions to limit the impact of these time-consuming  
63 movements (Saleri Lunazzi et al., 2021). Conversely, if the sensory evidence guiding the choice  
64 is weak and the deliberation takes time, humans and monkeys shorten the duration of the  
65 movement expressing that choice (Thura, 2020; Thura et al., 2014). Individuals thus seem to be  
66 primarily concerned about determining a global behavior duration rather than optimizing  
67 decision and action durations separately, even if the resulting decision or movement accuracy  
68 must slightly suffer. This “holistic-heuristic” policy may serve what matters the most for  
69 decision-makers during successive decisions between actions, the rate of reward (Balci et al.,  
70 2011; Carland et al., 2019; Thura, 2021).

71 Importantly, most of the adjustments mentioned above occur between blocks of tens to hundreds  
72 of trials, depending on stable contexts favoring a fixed movement or decision speed-accuracy  
73 trade-off. But can these adjustments also occur on shorter time scales, from trial to trial,  
74 depending on local decisional and motor performance?

75 Indeed, performance history is known to exert a large influence on subsequent behavior (e.g.  
76 Danielmeier & Ullsperger, 2011; Jentsch & Dudschig, 2009; Urai et al., 2019). The most well-  
77 known post-outcome adjustment is a reduction of behavior speed after committing an error,  
78 namely post-error slowing (PES). PES is sometimes accompanied by changes in accuracy,  
79 although conditions leading to PES-related increase or decrease of accuracy are still unclear  
80 (Danielmeier & Ullsperger, 2011; Fievez et al., 2022). Notably, post-outcome adjustments have  
81 been mostly described as the effect of a choice on the decisional performance in the following  
82 trial (Dutilh et al., 2012; Laming, 1979; Rabbitt & Rodgers, 1977; Thura et al., 2017; Urai et al.,  
83 2019), but the influence of a movement outcome on the motor performance in the following trial  
84 did not receive the same attention (Ceccarini & Castiello, 2018). Moreover, the consequences of  
85 either a decision or a motor outcome on *both* subsequent decision and movement have never  
86 been investigated. These are important questions to address in order to further evaluate the level  
87 of integration of the decision and the action functions during goal-directed behavior.

88 In the present report, we aim at investigating the consequences of *a decision outcome* on the next  
89 trial decision *and* motor performance. We also aim at analyzing the effect of *a motor outcome* on  
90 the next trial decision *and* motor performance. Because we make the hypothesis that humans  
91 decide and act in a “holistic-heuristic” way, we predict that any adjustment due to a decision or a  
92 motor outcome will be shared and integrated across the decision and the movement in the next  
93 trial. This hypothesis also predicts that the integrated post-outcome adjustments will depend on  
94 the capacity of the subject to “freely” share decision time for action time, and vice versa, if  
95 needed.

96 To test this hypothesis, we analyzed datasets from two recent studies of our group during which  
97 human subjects made successive perceptual decisions between actions. In the first experiment

98 (Reynaud et al., 2020; Thura, 2020), participants could invest up to 3s in the decision process  
99 and had up to 800ms to execute the reaching movement expressing a choice. In the other  
100 experiment (Saleri Lunazzi et al., 2021), the decision component of the task was similar but  
101 reaching duration was strictly bounded. By analyzing changes of several decision and motor  
102 parameters from one trial to the next, we found multiple context-dependent post-decision and  
103 post-movement outcome adjustments of both subsequent decision and motor speed-accuracy  
104 tradeoffs.

## 105 [Material and methods](#)

### 106 [Participants](#)

107 Two groups of healthy, human subjects participated in the two experiments described in this  
108 report. Twenty subjects (ages: 20-41; 16 females, 4 males; 18 right-handed) performed the free-  
109 movement duration (FMD) task and thirty-one other subjects (ages: 18-36; 20 females, 11 males;  
110 29 right-handed) performed the constrained-movement duration (CMD) task. All gave their  
111 consent orally before starting the experiment. The ethics committee of Inserm (IRB00003888)  
112 approved the protocol on March 19<sup>th</sup> 2019. Each participant performed two experimental  
113 sessions of the same task. They received monetary compensation for completing each session  
114 (either 40 € for the FMD task or 30 € for the CMD task).

### 115 [Datasets](#)

116 The decision and motor behaviors of these subjects have been described in three recent  
117 publications reporting the effects of the decisional context on movement properties (Thura,  
118 2020) and the effects of the motor context on decision strategies (Reynaud et al., 2020; Saleri  
119 Lunazzi et al., 2021). In these reports, subjects' behavioral adjustments are described either

120 within a given trial (i.e. the relation between a decision duration and the duration of the  
 121 movement produced to express that decision) or between specific conditions designed to set  
 122 stable decision or motor speed-accuracy contexts in blocks of tens of trials. Here, we aim at  
 123 describing adjustments of subjects' behavior from trial to trial, depending on their decision  
 124 and/or motor performance.

125

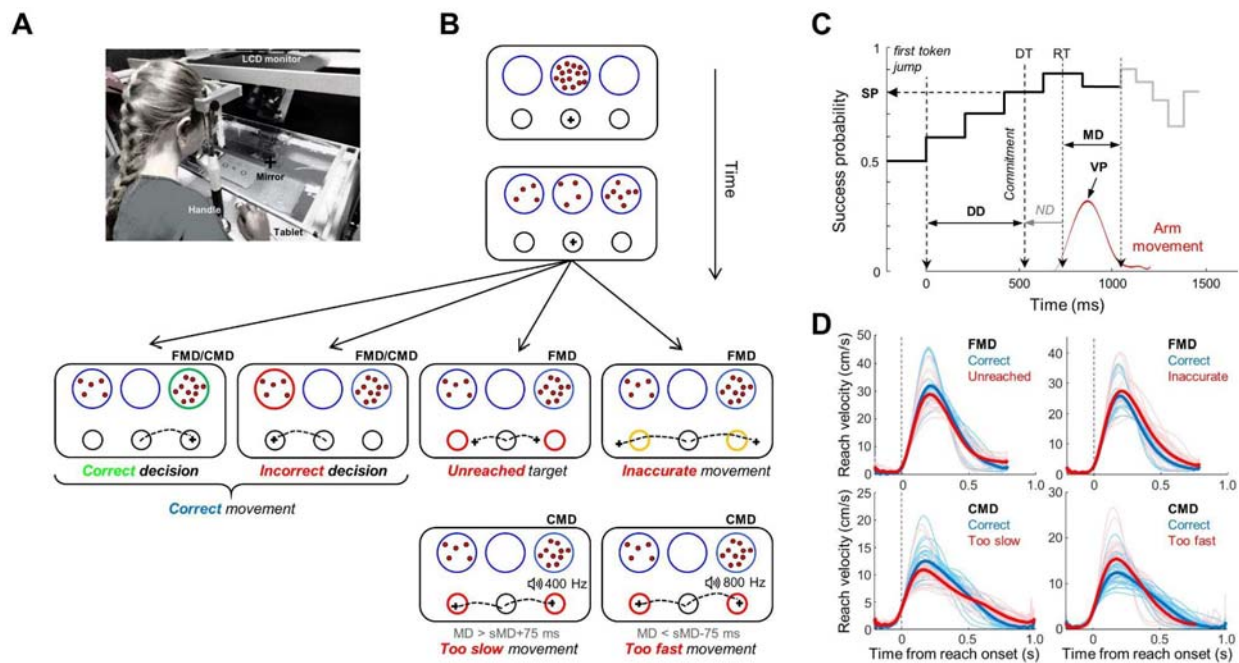

126

127 **Figure 1. Methods.** A. Experimental apparatus, identical in both the FMD and CMD tasks. B. Time  
 128 course of a trial in the decision task. Tokens jump one-by-one from the central decision circle to one of  
 129 the two lateral ones. Subjects move a cursor from a central movement target to one of the two lateral ones  
 130 to express their choice. All the decision and action outcomes are illustrated in the bottom panels (please  
 131 refer to the main text for details). MD: Movement duration; sMD: Spontaneous movement duration. C.  
 132 Temporal profile of success probability (SP) in one example trial of the decision task. At the beginning of  
 133 the trial, each target has the same success probability (0.5). When the first token jumps into one of the two  
 134 potential targets (the most leftward vertical dotted line), the success probability of that target increases to  
 135 ~0.6. Success probability then evolves with every jump. Subjects execute a reaching movement (red trace)  
 136 to report their choice. Kinematic data allow to compute movement duration (MD) and movement  
 137 peak velocity (VP). Non-decisional (ND) delays, determined in a separate reaction time task, allow to  
 138 estimate decision duration (DD) and success probability (SP) at decision time. Only 10 out of 15 jumps  
 139 are illustrated on this SP profile. D. Average reach velocity profiles aligned on reaching movement onset.  
 140 Correct and “unreached” movements executed in the FMD task are compared in the top left panel;  
 141 Correct and “inaccurate” movements executed in the FMD task are compared in the top right panel.

142 Correct and “too slow” movements executed in the CMD task are compared in the bottom right panel.  
143 Correct and “too fast” movements executed in the CMD task are compared in the bottom left panel.

144

145

146

147

148 Setup and tasks

149 The experimental apparatus (figure 1A), identical in the two tasks, as well as visual displays  
150 (figure 1B), are detailed and illustrated in the previous publications mentioned above (Reynaud  
151 et al., 2020; Saleri Lunazzi et al., 2021; Thura, 2020). The subjects sat in an armchair and made  
152 planar reaching movements using a handle held in their dominant hand. A digitizing tablet  
153 (GTCO CalComp) continuously recorded the handle horizontal and vertical positions (100 Hz  
154 with 0.013 cm accuracy). Target stimuli and cursor feedback were projected by a LCD monitor  
155 onto a half-silvered mirror suspended 26 cm above and parallel to the digitizer plane, creating the  
156 illusion that targets floated on the plane of the tablet. Participants were faced with a visual  
157 display consisting of three blue circles (the decision circles) placed horizontally at a distance of 6  
158 cm from each other. In the central blue circle, 15 tokens were randomly arranged. Positioned  
159 below, three black circles, organized horizontally as well, defined the movement targets. The  
160 central black circle radius was 0.75 cm. The size and location of the lateral black circles could  
161 vary in blocks of trials depending on the task. In the free-movement duration (FMD) task, that  
162 size was set to be either 0.75 or 1.5 cm of radius, and distance from the central circle was varied  
163 to be either 6 or 12 cm (as mentioned above, effects of target size/position on subjects’ behavior  
164 are not included in the present report). In the constrained-movement duration (CMD) task, we

165 analyzed trials for which the target size was set to be 1.5 cm of radius and distance from the  
166 central circle was set to 6 cm.

167 In both the FMD and the CMD tasks (figure 1B), implemented by means of LabView 2018  
168 (National Instruments), subjects initiated a trial by holding the handle into the black central circle  
169 (starting position) for 500ms. Tokens then started to jump, one by one, every 200ms, in one of  
170 the two possible lateral blue circles. Subjects had to decide which of the two lateral blue circles  
171 would receive the majority of the tokens at the end of the trial. They reported their decisions by  
172 moving the lever into the lateral movement target corresponding to the side of the chosen  
173 decision circle. Crucially, participants were allowed to make and report their choice at any time  
174 between the first and the last token jump. Once a target was reached, the remaining tokens  
175 jumped more quickly to their final circles (figure 1C, gray line), implicitly encouraging subjects  
176 to decide before all tokens had jumped to save time and increase their rate of reward at the  
177 session level. In the FMD task, tokens could speed up either a lot (a jump every 50ms) or a little  
178 (a jump every 150ms) in given blocks of trials. These block-related effects are not included in  
179 the present report. In the CMD task, the remaining tokens jumped every 50ms.

180 In the free-movement duration (FMD) task, subjects had up to 800ms to reach a target and report  
181 their choices. If no target was reached within 800ms, trials were classified as “unreached” trials,  
182 regardless of the direction of the movement with respect to the starting position. If the subject  
183 reached a target but failed to stop in it within 800ms, the trial was classified as “inaccurate” trial,  
184 regardless of the choice made, correct or incorrect (figure 1B).

185 In the constrained-movement duration (CMD) task, participants were instructed to reach a target  
186 within a 75-ms time interval around their spontaneous mean movement duration, computed in  
187 separate and dedicated trials (please see Saleri Lunazzi et al., 2021 for details). Consequently, if



188 for a given subject we estimated a mean spontaneous reaching duration of 400ms for the 6 cm  
189 long movements, then this subject had to report each of her/his choices by executing a movement  
190 whose duration was strictly bounded between 325 and 475ms. In this CMD task, a trial was thus  
191 considered as a movement error trial when the subject did not meet these temporal constraints,  
192 even if the correct decision was made. We distinguished either “too slow” and “too fast”  
193 movement errors (figure 1B).

194 At the end of each trial of both tasks, a visual feedback about decision success or failure (the  
195 chosen decision circle turning either green or red, respectively) was provided to the subject after  
196 the last token jump, assuming a correct movement. In the FMD task, a movement error was  
197 indicated by visual feedback. The chosen movement target turned orange in “inaccurate” trials,  
198 the two movement targets turned red in “unreached” trials. In the CMD task, a movement error  
199 was indicated by both a visual and a 500ms audio feedback (both movement targets turned red  
200 and an 800 or 400 Hz sound indicating that the movement was too fast or too slow, respectively,  
201 was played). Subjects had to make a specific number of correct trials (either 320 trials in the  
202 FMD task or 160 trials in the CMD task), indirectly motivating them to optimize successes per  
203 unit of time.

204 Finally, subjects also performed in each of the two sessions of both tasks a simple delayed-  
205 reaching task (DR task, 100 trials for subjects who performed the FMD task and 20 trials for  
206 subjects who performed the CMD task). This DR task was identical to the choice task described  
207 above, except that there was only one lateral decision circle displayed at the beginning of the  
208 trial (either at the right or at the left side of the central circle with 50% probability). All tokens  
209 moved from the central circle to this unique circle at a GO signal occurring after a variable delay

210 (1000 ± 150ms). The DR task was used to estimate the sum of the delays attributable to response  
211 initiation (i.e. non-decision delays).

212 Subsets of trials based on decision and movement outcomes

213 We first defined three subsets of trials common to both tasks (FMD and CMD), based on  
214 decision or movement outcomes: (1) “Correct decision” trials, when the subject chose the correct  
215 target and reported her/his choice with a correct movement; (2) “Incorrect decision” trials, if the  
216 participant chose the incorrect target with a correct movement. Note that for these two subsets,  
217 bad movement trials are excluded because no feedback was provided to the subject to indicate  
218 whether or not she/he chose the correct target. Instead, a salient feedback was provided at the end  
219 of the trial to indicate the movement error (see above and figure 1B); (3) “Correct movement”  
220 trials, when the subject adequately reached the correct or the incorrect target.

221 We defined two other subsets of trials based on movement errors in the FMD task specifically:  
222 (1) “Unreached” trials, when the subjects failed to reach a target (correct or incorrect) before the  
223 end of the movement duration deadline (800ms); (2) “Inaccurate” trials, when the subjects  
224 reached a target (correct or incorrect) but failed to stop in it.

225 Finally, two subsets of trials were defined based on movement errors in the CMD task  
226 specifically: (1) “Too fast movement” trials and (2) “too slow movement” trials, when the  
227 subjects reached a target (correct or incorrect) before the minimum instructed duration time and  
228 after the maximum instructed duration time, respectively.

229 Data analysis

230 Data were analyzed off-line using custom-written MATLAB (MathWorks) and R  
231 (<https://www.r-project.org/>) scripts. Reaching horizontal and vertical positions were first filtered

232 using polynomial filters and then differentiated to obtain a velocity profile. Onset and offset of  
233 movements were then determined using a 3.75 cm/s velocity threshold. Reaching movement  
234 duration (MD), peak velocity (VP) and amplitude (Amp) were respectively defined as the  
235 duration, the maximum velocity value and the Euclidean distance between these two events  
236 (figure 1C). Reaching movement accuracy was defined as the Euclidian distance separating the  
237 target center from the movement endpoint location (CED).

238 Decision duration (DD) was computed as the duration between the first token jump and the time  
239 at which subjects committed to their choice (figure 1C). To estimate this commitment time in  
240 each trial, we detected the time of movement onset as mentioned above, defining the subject's  
241 reaction time, and subtracted from it her/his mean sensory-motor delays estimated based on  
242 her/his reaction times in the DR task performed the same day and in the same condition.

243 To assess the influence of sensory evidence on subjects' choices, we computed the success  
244 probability profile of each trial experienced by participants with respect to the chosen target, as  
245 well as their decision success probability (SP) at the time of commitment time (figure 1C), using  
246 Equation 1. For instance, for a total of 15 tokens, if at a particular moment in time the target  
247 chosen by the subject contains  $N_{\text{chosen}}$  tokens, whereas the other target contains  $N_{\text{other}}$  tokens, and  
248 there are  $N_C$  tokens remaining in the center, then the probability that the chosen target will  
249 ultimately be the correct one, i.e. the subject's success probability (SP) at a particular time is as  
250 follows:

$$p(\text{Chosen} | N_{\text{chosen}}, N_{\text{other}}, N_C) = \frac{N_C!}{2^{N_C}} \sum_{k=0}^{\min(N_C, 7 - N_{\text{other}})} \frac{1}{k! (N_C - k)!} \quad (1)$$

251 To ensure that the difficulty of decisions was homogeneous among subjects and experimental  
252 conditions, we controlled the sequence of trials experienced by each participant in each session

253 of both tasks. Especially, we interspersed among fully random trials (~20% of the trials in which  
254 each token is 50% likely to jump into the right or the left lateral circle) three special types of  
255 trials, easy, ambiguous and misleading, characterized by particular temporal profiles of success  
256 probability. Subjects were not told about the existence of these trials. Please refer to Reynaud et  
257 al., 2020 and Saleri Lunazzi et al., 2021 for a detailed description of these trial types and their  
258 proportions in the FMD and CMD tasks.

259 To assess the impact of the outcome of each trial  $i$  on the decision and motor behavior of trial  
260  $i+1$ , we calculated the difference of movement velocity peak ( $\Delta VP$ ), duration ( $\Delta MD$ ), amplitude  
261 ( $\Delta Amp$ ), accuracy ( $\Delta CED$ ), and the difference of decision duration ( $\Delta DD$ ) and success  
262 probability ( $\Delta SP$ ) between them (e.g.  $\Delta VP = VP_{i+1} - VP_i$ ). We then calculated for each subject  
263 the average of each variable with respect to trial  $i$  outcome.

#### 264 Statistics

265 To determine whether the behavioral adjustment from one trial to the following ( $\Delta VP$ ,  $\Delta MD$ ,  
266  $\Delta Amp$ ,  $\Delta CED$ ,  $\Delta DD$  and  $\Delta SP$ ) differs significantly from 0 in the different outcome conditions at  
267 the population level, we used one-sample Wilcoxon signed rank tests. A Levene's test was used  
268 to test if the distributions of the post-correct and post-error decision and motor variables have  
269 equal variances. Pearson's correlation tests were used to directly investigate the relationship  
270 between motor ( $\Delta VP$ ,  $\Delta MD$ ,  $\Delta Amp$ ,  $\Delta CED$ ) and decision ( $\Delta DD$ ,  $\Delta SP$ ) adjustments following  
271 different outcomes. For all statistical tests, the significance level is set to 0.05. Unless stated  
272 otherwise, data are reported as medians across the population. To estimate the difference  
273 between the average success probability profiles of two trial subsets (e.g. correct decision trials  
274 versus post-correct decision trials), we computed the distance between the two profiles (1 and 2)  
275 from token jump ( $j$ ) #1 to #15 as the following chi-squared metric:

$$\chi^2 = \sum_{j=1}^{15} \frac{(y_{1,j} - y_{2,j})^2}{\sigma_j^2}, \quad (2)$$

276 where  $y_1$  and  $y_2$  are the two SP profiles averaged across subjects, and  $\sigma_j^2$  is the mean squared  
277 variance of the SP profiles, such as  $\sigma_j^2 = \frac{1}{2}(\sigma_{1,j}^2 + \sigma_{2,j}^2)$ .

## 278 Results

279 Effect of a decision outcome on the next decision and on the next movement in the  
280 FMD task

281 We first describe the impact of the decision outcome (correct or incorrect choice) on  
282 participants' subsequent decisional behavior when the motor temporal constraints were low  
283 (FMD task). As shown in figure 2A, subjects' decision duration was significantly increased  
284 compared to a previous incorrect decision (median  $\Delta DD = +70.6$ ms, Wilcoxon signed rank test,  
285  $Z = 2.4$ ,  $p = 0.015$ ). This slowdown of decision-making was observed despite that trials following  
286 an incorrect choice were easier, as can be seen on the averaged success probability (SP) profiles  
287 of the two trial subsets ( $\chi^2 = 2119$ , inset in figure 2A, top right panel; Suppl. figure 1 illustrates  
288 the SP profiles of the same trials computed with respect to the correct target). As a consequence,  
289 subjects' SPs at decision time were increased following incorrect decisions ( $\Delta SP = +0.09$ ,  $Z = 3.9$ ,  
290  $p < 0.001$ ). By contrast, no significant difference of decision duration ( $\Delta DD = -2.8$ ms) was  
291 observed following a correct decision. Together, this first analysis demonstrates that most  
292 subjects used a post-error slowing strategy to decide in this task, as can be seen when decision  
293 durations following either a correct or a bad choice are directly compared (suppl. figure 2).  
294 Interestingly, subjects did not adjust their decision duration following a correct trial despite that  
295 these trials were on average slightly more difficult ( $\chi^2 = 207$ , inset in figure 2A, bottom right

296 panel). Participants' success probability thus slightly decreased after a correct choice ( $\Delta SP = -$   
 297 0.02,  $Z = -3.9$ ,  $p < 0.001$ ), indicating that they committed to a decision with less sensory evidence  
 298 after a correct trial.

299

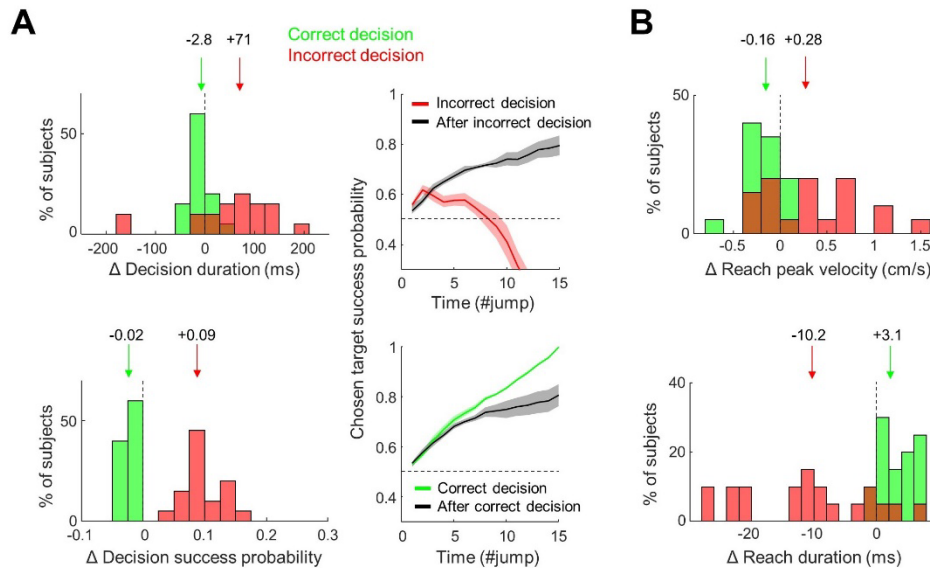

300

301 **Figure 2. Effect of a decision outcome on the next decision and on the next movement in the FMD**  
 302 **task.** A. Left panels: Distribution and comparison of decision duration (top) and success probability  
 303 (bottom) adjustments depending on the decision outcome in the previous trial (after a correct trial in green  
 304 or after an incorrect decision in red). Arrows mark the population medians whose values are reported  
 305 above. The dotted black line indicates zero difference between the trial  $i$  and  $i+1$ . If  $\Delta$  is positive, there is  
 306 a post-outcome increase for a given metric  $X$  ( $X_{i+1} - X_i > 0$ ) whereas a negative  $\Delta$  value indicates a  
 307 decrease of this metric. Right panel, top: Comparison of the average  $\pm$  SD success probability profiles  
 308 between trials whose decision was incorrect (red solid line) and trials following an incorrect choice (black  
 309 dotted line), computed across subjects with respect to the target they chose. Right panel, bottom: same  
 310 comparison between correct decision trials (green solid line) and trials following a correct decision (black  
 311 solid line). B: Same analysis as in A, left panels, for the post-decision outcome adjustments computed for  
 312 movement peak velocity (top) and duration (bottom).

313

314 We next investigate whether or not a decision outcome also impacts motor behavior. We found  
 315 that following incorrect decisions, subjects made overall faster movements ( $\Delta VP = +0.28$  cm/s,  
 316  $Z = 2.4$ ,  $p = 0.01$ ), thus reducing their reaching duration ( $\Delta MD = -10.2$  ms,  $Z = 3.5$ ,  $p < 0.001$ , figure  
 317 2B) despite a decrease of amplitude ( $\Delta Amp = -0.08$  cm,  $Z = -3$ ,  $p = 0.002$ , suppl. figure 3). We also

318 observed at the population level an increase of movement inaccuracy after an incorrect choice  
319 ( $\Delta\text{CED}=+0.06$  cm,  $Z=3.1$ ,  $p=0.002$ ), but this effect was also observed for trials following correct  
320 decisions ( $\Delta\text{CED}=+0.06$  cm,  $Z=3.9$ ,  $p<0.001$ , suppl. figure 3).

321 Effect of a movement outcome on the next decision and on the next movement in  
322 the FMD task

323 In the free-movement duration (FMD) task, we distinguished two types of movement error:  
324 “Inaccurate” trials, when a target was reached but subjects failed to stop in it, and “unreached”  
325 trials, when the subject failed to reach a target before the movement duration deadline (800ms in  
326 the FMD task). “Inaccurate” movements were thus on average faster (26.8 vs 26 cm/s), larger in  
327 amplitude (9.2 vs 8.7 cm) and longer (557 vs 530ms) compared to correct movements (figure  
328 1D, top right panel). As expected, subjects corrected these inaccurate movements in the  
329 following trial ( $\Delta\text{CED}=-0.19$  cm,  $Z=-2.6$ ,  $p=0.01$ ) by decreasing their reaching velocity peak  
330 ( $\Delta\text{VP}=-1.7$  cm/s,  $p=0.001$ ,  $Z=-3.2$ , figure 3A, top panels). Participants also reduced their  
331 movement amplitude ( $\Delta\text{Amp}=-1.1$  cm,  $Z=-3.9$ ,  $p<0.001$ ) and duration ( $\Delta\text{MD}=-40$ ms,  $Z=-3$ ;  
332  $p=0.002$ ) in trials following an inaccurate movement (suppl. figure 4A).

333 As illustrated in the bottom panels of figure 3A, population mean decision durations and success  
334 probabilities are much variable and distributed in trials following an inaccurate movement  
335 compared to trials following a correct movement ( $\text{SD}=182$  versus 4.6ms, respectively; Levene’s  
336 test,  $F=21.7$ ,  $p<0.0001$ ). In terms of medians, decision durations following an inaccurate  
337 movement were overall shorter compared to trials for which a movement was inaccurate, but this  
338 difference is not significant ( $\Delta\text{DD}=-39$ ms). We also observed a slight but significant increase of  
339 decision success probability ( $\Delta\text{SP}=+0.04$ ,  $Z=2.8$ ,  $p=0.005$ ) following inaccurate movements,  
340 possibly because of the slightly higher SP profile of trials following inaccurate movements

341 compared to the error movement trials ( $\chi^2=21.8$ , figure 3A, bottom right panel). To directly  
 342 assess the relationship between motor and decision adjustments due to inaccurate movements,  
 343 we computed linear regressions between all differences of motor ( $\Delta VP$ ,  $\Delta MD$ ,  $\Delta CED$ ,  $\Delta Amp$ )  
 344 and decision ( $\Delta DD$ ,  $\Delta SP$ ) metrics. We found a significant negative correlation between  $\Delta MD$   
 345 and  $\Delta DD$  (Pearson correlation,  $R=-0.62$ ,  $p=0.003$ ) and a significant positive correlation between  
 346  $\Delta MD$  and  $\Delta SP$  ( $R=0.66$ ,  $p=0.003$ ), indicating that subjects who decreased their subsequent  
 347 reaching duration the most after an inaccurate movement increased their subsequent decision  
 348 duration and decrease their subsequent decision success probability the most as well (suppl.  
 349 figure 4B).

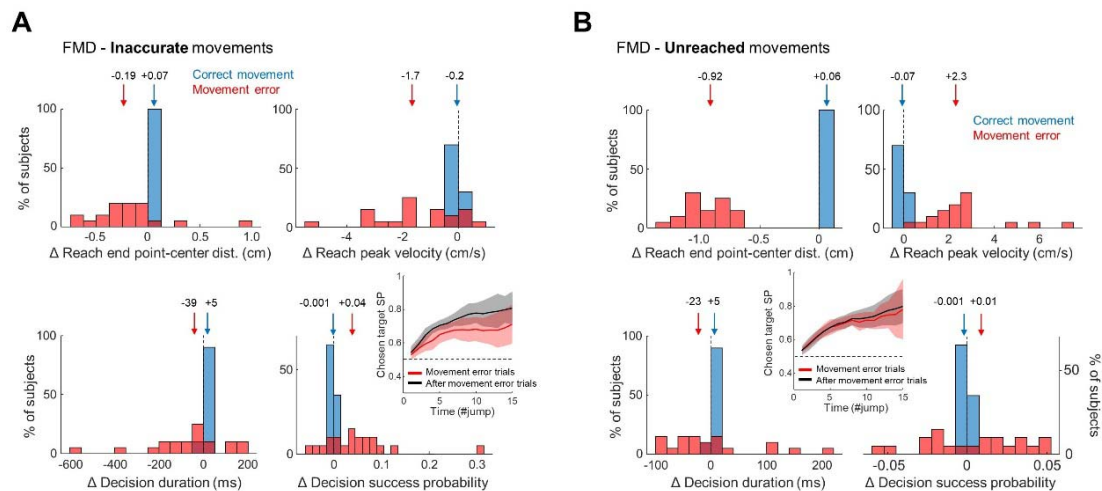

351 **Figure 3. Effect of movement errors on subsequent motor and decision behaviors in the FMD task.**  
 352 A. Top: Distribution and comparison of reaching movement end-point center distance (left) and peak  
 353 velocity (right) adjustments depending on the movement outcome in the previous trial (after a correct  
 354 movement in blue and after an “inaccurate” movement in red). Bottom: Distribution and comparison of  
 355 decision duration (left) and success probability (right) adjustments depending on the movement outcome  
 356 in the previous trial (after a correct movement in blue and after an “inaccurate” movement in red). The  
 357 inset illustrates the average  $\pm$  SD success probability profiles of inaccurate movement trials (red) and  
 358 post-inaccurate movement trials (black), computed across subjects. B. Same as A for the “unreached”  
 359 trials.

360



361 While various reasons could lead to “unreached” trials, we noticed that overall, movements in  
362 these trials were on average slower compared to correct movements (figure 1D, top left panel).  
363 Following these unreached trials, subjects significantly increased their movement accuracy in the  
364 next trial ( $\Delta\text{CED}=-0.92$  cm,  $Z=-3.9$ ,  $p<0.001$ ) by increasing their reaching velocity peak  
365 ( $\Delta\text{VP}=+2.3$  cm/s,  $Z=3.9$ ,  $p<0.001$ , figure 3B, top panels). They also increased their reaching  
366 amplitude ( $\Delta\text{Amp}=+1$  cm,  $Z=3.9$ ,  $p<0.001$ ) and duration ( $\Delta\text{MD}=+20\text{ms}$ ,  $Z=2.9$ ,  $p=0.004$ )  
367 compared to the previous erroneous trials (suppl. figure 4C).

368 After an “unreached” movement, we did not observe significant adjustments of the decisional  
369 behavior in the next trial at the population level ( $\Delta\text{DD}=-23\text{ms}$ ,  $\Delta\text{SP}=+0.01$ ), although  
370 distributions of mean decision durations and success probabilities are broader in trials following  
371 an unreached movement compared to trials following a correct movement ( $\text{SD}= 83$  versus  $4.6\text{ms}$ ;  
372 Levene’s test,  $F=25$ ,  $p<0.0001$  figure 3B, bottom panels). We found however a significant  
373 positive correlation between the adjustment of peak velocities ( $\Delta\text{VP}$ ) following an unreached  
374 movement trial and the adjustment of decision durations ( $\Delta\text{DD}$ ) in the same condition ( $R=0.48$ ,  
375  $p=0.04$ , suppl. figure 4D), indicating that participants who increased their movement speed the  
376 most after an unreached movement trial also increased their decision duration the most.

377 Post-outcome adjustments of decision and motor behaviors in the CMD task

378 The previous paragraphs describe behavioral adjustments of subjects performing the free-  
379 movement duration (FMD) task. In the following lines, we report the same analyses applied on a  
380 dataset collected in the constrained movement duration (CMD) task. In this task, the duration of  
381 a movement executed to report a choice was strictly bounded (see methods), increasing the  
382 difficulty of the motor aspect of the task. In the FMD task, the average percentage of error trials  
383 was 25%, among which 18% of decisional errors and 7% of movement errors. In the CMD task

384 however, about 50% of trials were unsuccessful, with only 12% of decisional errors but 38% of  
 385 movement errors.

386 We first assessed whether a decision outcome influenced the subsequent decision behavior in the  
 387 CMD task. As shown in figure 4A, the slowdown of decisions observed following incorrect  
 388 choices in the FMD task was not found in the CMD task ( $\Delta DD = -5\text{ms}$ ). Subsequent decision  
 389 success probabilities were increased following incorrect decisions ( $\Delta SP = +0.12$ ,  $Z = 4.8$ ,  $p < 0.001$ ),  
 390 an adjustment likely due to post-incorrect decision trials that were easier compared to incorrect  
 391 decision trials ( $\chi^2 = 767$ , inset in figure 4A, right panel). Despite that a decision outcome did not  
 392 influence the next decision in the CMD task, we observed that following incorrect choices,  
 393 participants increased their reaching velocity peak ( $\Delta VP = +0.24\text{ cm/s}$ ,  $Z = 3$ ,  $p = 0.003$ ), leading to  
 394 a decrease of movement duration ( $\Delta MD = -13\text{ms}$ ,  $Z = -3.4$ ,  $p < 0.001$ , figure 4B).

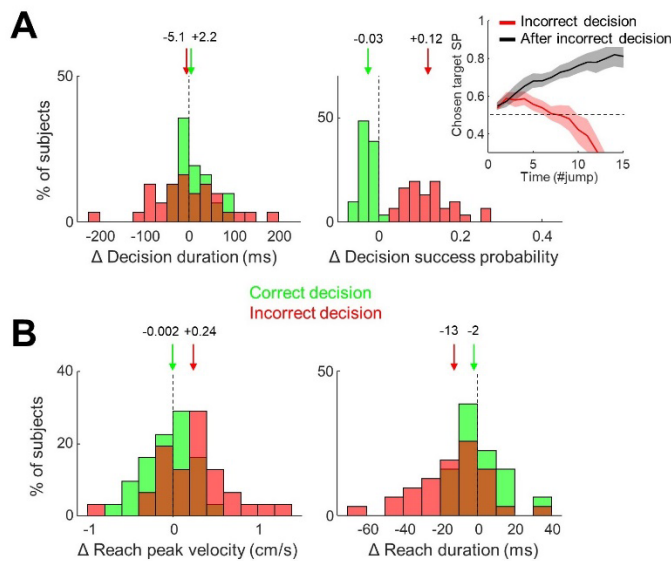

**Figure 4. Effect of decision outcomes on subsequent decision and motor behaviors in the CMD task.** A. Distribution and comparison of decision duration (left) and success probability (right) adjustments depending on the decision outcome in the previous trial (after a correct decision in green and after an error decision in red). The inset illustrates the average  $\pm$  SD success probability profiles of incorrect decision trials (red) and post-incorrect decision trials (black), computed across subjects. B: Distribution and comparison of reaching peak velocity (left) and duration (right) adjustments depending on the decision outcome in the previous trial (same conventions as in A).

411

412 In the last two paragraphs, we investigate the consequences of a movement error in the CMD  
 413 task, i.e. too fast or too slow movements, on subjects' behavior in the next trial. As expected,  
 414 following too fast movements, participants significantly decreased their reaching velocity peak

415 ( $\Delta VP = -3.1$  cm/s,  $Z = -4.8$ ,  $p < 0.001$ ), leading to an increase of movement duration ( $\Delta MD = +62$  ms,  
 416  $Z = 4.8$ ,  $p < 0.001$ , figure 5A, top panels). This adjustment was accompanied by a decrease of  
 417 amplitude ( $\Delta Amp = -0.35$  cm,  $Z = -4.8$ ,  $p < 0.001$ ) and a decrease of accuracy ( $\Delta CED = +0.2$  cm,  
 418  $Z = 4.8$ ,  $p < 0.001$ , suppl. figure 5A). The duration of decisions at the population level was  
 419 significantly decreased following too fast movements in the CMD task ( $\Delta DD = -79$  ms,  $Z = -3.7$ ,  
 420  $p < 0.001$ , figure 5A, bottom left panel). Crucially, this adjustment is not due to a difference of  
 421 decision difficulty between the two trial subsets ( $\chi^2 = 1.2$ , inset in figure 5A, bottom right panel),  
 422 and no variation of decision success probability (SP) was observed following too fast movement  
 423 trials.

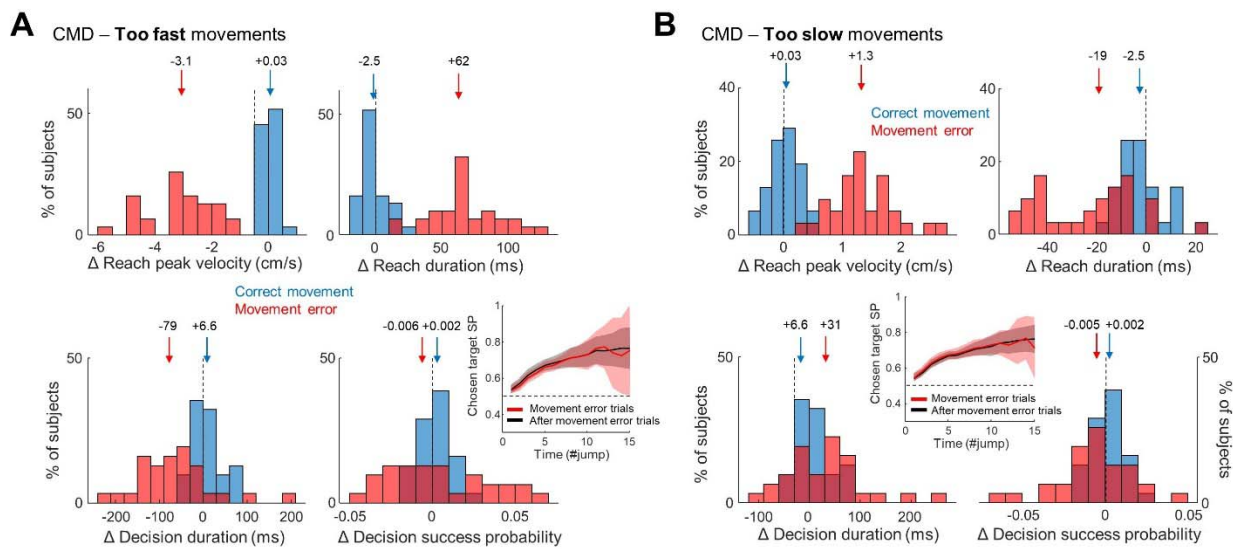

424  
 425 **Figure 5. Effect of movement errors on subsequent motor and decision behaviors in the CMD task.**  
 426 A. Top: Distribution and comparison of reaching movement peak velocity (left) and duration (right)  
 427 adjustments depending on the movement outcome in the previous trial (after a correct movement in blue  
 428 and after a too fast movement in red). Bottom: Distribution and comparison of decision duration (left) and  
 429 success probability (right) adjustments depending on the movement outcome in the previous trial (same  
 430 convention as above). The inset illustrates the average  $\pm$  SD success probability profiles of too fast  
 431 movement trials (red) and post-too fast movement trials (black), computed across subjects. B. Same as A  
 432 for too slow movement trials in the CMD task.

433

434 After too slow movements, participants unsurprisingly increased their movement velocity peak  
435 ( $\Delta V P = +1.3$  cm/s,  $Z = 4.8$ ,  $p < 0.001$ ), which reduced reaching durations ( $\Delta M D = -19$ ms,  $Z = -4.4$ ,  
436  $p < 0.001$ , figure 5B, top panels). Movement amplitude ( $\Delta A m p = +0.3$  cm,  $Z = 4.8$ ,  $p < 0.001$ ) and  
437 accuracy ( $\Delta C E D = -0.29$  cm,  $Z = -4.8$ ,  $p < 0.001$ ) were also significantly increased (suppl. figure  
438 5B). Notably, following too slow movements, the duration of decisions was in this case  
439 significantly increased ( $\Delta D D = +31$ ms,  $Z = 2.1$ ,  $p = 0.038$ ), despite no difference between the SP  
440 profiles in the tow trial subsets ( $\chi^2 = 0.5$ ), without a significant modulation of decision SP (figure  
441 5B, bottom panels).

## 442 Discussion

443 In the present study we first observed that in the free-movement duration (FMD) task, most  
444 subjects slowed down their choices following a decision error. Post-(decision) error slowing  
445 (PES) is a phenomenon commonly reported in the literature (Danielmeier & Ullsperger, 2011;  
446 Jentsch & Dudschig, 2009; Laming, 1979; Purcell & Kiani, 2016; Rabbitt & Rodgers, 1977;  
447 Thura et al., 2017), even if post-error speeding has been described as well (e.g. King et al.,  
448 2010). PES is often interpreted as an error-induced increase in response caution that allows one  
449 to improve subsequent performance. Interestingly, after a correct choice, subjects did not adjust  
450 their choice durations, but they committed with less sensory evidence. Because post-correct  
451 decision trials were slightly more difficult than correct trials, this result suggests that a successful  
452 behavior increased participants' confidence, possibly promoting risk taking (Bandura & Locke,  
453 2003).

454 The present report reveals the properties of the decision-related PES further by showing that  
455 participants did not adjust their decision duration following a bad decision in the constrained-  
456 movement duration (CMD) task. To explain this observation, it could first be argued that post-

457 decision error trials were overall easier compared to trials in which a decision error occurred.  
458 Although possible, the difference of success probability profiles in the two trial subsets was  
459 similar in the FMD and CMD tasks, suggesting another reason for the lack of PES in the CMD  
460 task. Alternatively, it is known that PES partly depends on error frequency (Notebaert et al.,  
461 2009), and participants made more errors in the CMD task compared to the FMD task. However,  
462 errors in the CMD task concerned mostly movements, and decision error rates were similar in the  
463 two tasks. We thus believe that the lack of decision-related PES in the CMD task primarily  
464 relates to the strict duration constraints imposed on movements in this task (see below).

465 We also observed the expected, yet very robust, post-movement error adjustments in  
466 participants' motor behavior. Generally, effects of behavior history on subsequent behavior have  
467 been investigated by means of cognitive tasks (Dutilh et al., 2012; Notebaert et al., 2009; Rabbitt  
468 & Rodgers, 1977), limiting the analysis to pre-movement processes (but see Ceccarini &  
469 Castiello, 2018). The present report describes, to our knowledge, the first analysis addressing the  
470 impact of decision *and* action outcomes on *both* the decision and action executed in the  
471 following trial. This is important because in most everyday life choices, decisions and  
472 movements expressing these choices are temporally linked, constituting a continuum separating  
473 an event from a potential reward (Cisek, 2007).

474 We found that after a slower choice made in response to a decision error, movement duration, if  
475 unconstrained, is reduced. This result is consistent with recent reports in both human and non-  
476 human primates showing that within blocks of trials defined by specific speed-accuracy tradeoff  
477 (SAT) properties, long decisions are expressed with vigorous, short movements (Thura, 2020;  
478 Thura et al., 2014). We show here that this policy can be established on a shorter time scale,  
479 from trial to trial, based on subject's previous trial outcomes.

480 Conversely, we found that when participants had to correct a bad movement, they not only  
481 adequately adjusted their movements in the following trial, but they also altered the decision  
482 made in this following trial, prior to the corrected movement expressing that choice. This  
483 observation is at first sight consistent with several studies showing that the cost of a movement  
484 executed to report a choice influences that choice in a given trial (Burk et al., 2014; Hagura et al.,  
485 2017; Marcos et al., 2015). But it actually differs by demonstrating for the first time the ability of  
486 humans to preemptively compensate for a movement correction due to a motor error by altering  
487 the deliberation process of the post-error trial, before the execution of the corrected movement.

488 A possible functional interpretation of the reduction of movement duration accompanying a  
489 decision-related PES (in the FMD task) is that subjects aimed at compensating the extra time  
490 devoted to deliberation by executing faster movements, even if shortening movement duration  
491 usually leads to a slight decrease of accuracy. In ecological scenarios, individuals are indeed  
492 often free to adjust the time they invest in deciding versus moving, and movements are  
493 parametrized following “economic” rules (e.g. Shadmehr et al., 2019), allowing to optimize what  
494 matters the most for individuals during successive choices, the rate of reward (Balci et al., 2011;  
495 Bogacz et al., 2010; Carland et al., 2019).

496 In agreement with a reward rate maximization account, when a movement was corrected by  
497 increasing or decreasing its duration, most participants decreased or increased their decision  
498 duration, respectively, within the same trial. This is consistent with our previous reports in which  
499 compensatory effects are described across blocks of tens of trials defined by specific motor SAT  
500 constraints (Reynaud et al., 2020; Saleri Lunazzi et al., 2021). This suggests that one can flexibly  
501 share temporal resources between the decision and the action processes depending on both global  
502 and local contexts, even if these processes must slightly suffer in terms of accuracy (i.e. a good

503 enough, or heuristic, approach, Gigerenzer & Gaissmaier, 2011). According to this mechanism,  
504 the absence of decision-related PES when movement duration was strictly bounded would mean  
505 that subjects anticipated that they could not compensate for a potential extension of their decision  
506 duration following a bad choice during the movement phase, discouraging them to slow down  
507 their decisions after a decision error. Intriguingly, they still produced faster and shorter  
508 movements after a bad choice, indicating here an adjustment of movement duration that does not  
509 depend on the decision determining this movement. It is possible that in this specific task where  
510 errors were frequent (~50%), subjects aimed at limiting the waste of time due to an erroneous  
511 trial by moving slightly faster in the next trial despite the strict constraints imposed on movement  
512 duration.

513 Taken together, the present results indicate that following both decision and movement errors,  
514 humans are primarily concerned about determining a behavioral duration as a whole instead of  
515 optimizing each of the decision and action speed-accuracy trade-offs independently of each  
516 other, probably with the goal of maximizing their success rate.

### 517 [Open practices statement](#)

518 The data and materials for the two experiments are available upon request. None of the  
519 experiments was preregistered.

### 520 [References](#)

521 Balci, F., Simen, P., Niyogi, R., Saxe, A., Hughes, J. A., Holmes, P., & Cohen, J. D. (2011).  
522 Acquisition of decision making criteria: Reward rate ultimately beats accuracy. *Attention,*  
523 *Perception, & Psychophysics*, 73(2), 640–657. <https://doi.org/10.3758/s13414-010-0049->

524 7



- 525 Bandura, A., & Locke, E. A. (2003). Negative self-efficacy and goal effects revisited. *Journal of*  
526 *Applied Psychology*, 88(1), 87–99. <https://doi.org/10.1037/0021-9010.88.1.87>
- 527 Bogacz, R., Hu, P. T., Holmes, P. J., & Cohen, J. D. (2010). Do humans produce the speed–  
528 accuracy trade-off that maximizes reward rate? *Quarterly Journal of Experimental*  
529 *Psychology*, 63(5), 863–891. <https://doi.org/10.1080/17470210903091643>
- 530 Burk, D., Ingram, J. N., Franklin, D. W., Shadlen, M. N., & Wolpert, D. M. (2014). Motor Effort  
531 Alters Changes of Mind in Sensorimotor Decision Making. *PLoS ONE*, 9(3), e92681.  
532 <https://doi.org/10.1371/journal.pone.0092681>
- 533 Carland, M. A., Thura, D., & Cisek, P. (2019). The Urge to Decide and Act: Implications for  
534 Brain Function and Dysfunction. *The Neuroscientist*, 107385841984155.  
535 <https://doi.org/10.1177/1073858419841553>
- 536 Ceccarini, F., & Castiello, U. (2018). The grasping side of post-error slowing. *Cognition*, 179, 1–  
537 13. <https://doi.org/10.1016/j.cognition.2018.05.026>
- 538 Choi, J. E. S., Vaswani, P. A., & Shadmehr, R. (2014). Vigor of Movements and the Cost of  
539 Time in Decision Making. *Journal of Neuroscience*, 34(4), 1212–1223.  
540 <https://doi.org/10.1523/JNEUROSCI.2798-13.2014>
- 541 Cisek, P. (2007). Cortical mechanisms of action selection: The affordance competition  
542 hypothesis. *Philosophical Transactions of the Royal Society B: Biological Sciences*,  
543 362(1485), 1585–1599. <https://doi.org/10.1098/rstb.2007.2054>
- 544 Cos, I., Bélanger, N., & Cisek, P. (2011). The influence of predicted arm biomechanics on  
545 decision making. *Journal of Neurophysiology*, 105(6), 3022–3033.  
546 <https://doi.org/10.1152/jn.00975.2010>



- 547 Danielmeier, C., & Ullsperger, M. (2011). Post-Error Adjustments. *Frontiers in Psychology*, 2,  
548 233. <https://doi.org/10.3389/fpsyg.2011.00233>
- 549 Dutilh, G., Vandekerckhove, J., Forstmann, B. U., Keuleers, E., Brysbaert, M., & Wagenmakers,  
550 E.-J. (2012). Testing theories of post-error slowing. *Attention, Perception &*  
551 *Psychophysics*, 74(2), 454–465. <https://doi.org/10.3758/s13414-011-0243-2>
- 552 Fievez, F., Derosiere, G., Verbruggen, F., & Duque, J. (2022). Post-error Slowing Reflects the  
553 Joint Impact of Adaptive and Maladaptive Processes During Decision Making. *Frontiers*  
554 *in Human Neuroscience*, 16, 864590. <https://doi.org/10.3389/fnhum.2022.864590>
- 555 Franklin, D. W., & Wolpert, D. M. (2011). Computational mechanisms of sensorimotor control.  
556 *Neuron*, 72(3), 425–442. <https://doi.org/10.1016/j.neuron.2011.10.006>
- 557 Gigerenzer, G., & Gaissmaier, W. (2011). Heuristic Decision Making. *Annual Review of*  
558 *Psychology*, 62(1), 451–482. <https://doi.org/10.1146/annurev-psych-120709-145346>
- 559 Hagura, N., Haggard, P., & Diedrichsen, J. (2017). Perceptual decisions are biased by the cost to  
560 act. *ELife*, 6, e18422. <https://doi.org/10.7554/eLife.18422>
- 561 Haith, A. M., Reppert, T. R., & Shadmehr, R. (2012). Evidence for Hyperbolic Temporal  
562 Discounting of Reward in Control of Movements. *Journal of Neuroscience*, 32(34),  
563 11727–11736. <https://doi.org/10.1523/JNEUROSCI.0424-12.2012>
- 564 Jentzsch, I., & Dudschig, C. (2009). Short Article: Why do we slow down after an error?  
565 Mechanisms underlying the effects of posterror slowing. *Quarterly Journal of*  
566 *Experimental Psychology*, 62(2), 209–218. <https://doi.org/10.1080/17470210802240655>
- 567 King, J. A., Korb, F. M., von Cramon, D. Y., & Ullsperger, M. (2010). Post-error behavioral  
568 adjustments are facilitated by activation and suppression of task-relevant and task-  
569 irrelevant information processing. *The Journal of Neuroscience: The Official Journal of*

- 570            *the Society for Neuroscience*, 30(38), 12759–12769.
- 571            <https://doi.org/10.1523/JNEUROSCI.3274-10.2010>
- 572    Laming, D. (1979). Choice reaction performance following an error. *Acta Psychologica*, 43(3),  
573            199–224. [https://doi.org/10.1016/0001-6918\(79\)90026-X](https://doi.org/10.1016/0001-6918(79)90026-X)
- 574    Marcos, E., Cos, I., Girard, B., & Verschure, P. F. M. J. (2015). Motor Cost Influences  
575            Perceptual Decisions. *PLOS ONE*, 10(12), e0144841.  
576            <https://doi.org/10.1371/journal.pone.0144841>
- 577    Morel, P., Ulbrich, P., & Gail, A. (2017). What makes a reach movement effortful? Physical  
578            effort discounting supports common minimization principles in decision making and  
579            motor control. *PLOS Biology*, 15(6), e2001323.  
580            <https://doi.org/10.1371/journal.pbio.2001323>
- 581    Notebaert, W., Houtman, F., Opstal, F. V., Gevers, W., Fias, W., & Verguts, T. (2009). Post-  
582            error slowing: An orienting account. *Cognition*, 111(2), 275–279.  
583            <https://doi.org/10.1016/j.cognition.2009.02.002>
- 584    Purcell, B. A., & Kiani, R. (2016). Neural Mechanisms of Post-error Adjustments of Decision  
585            Policy in Parietal Cortex. *Neuron*, 89(3), 658–671.  
586            <https://doi.org/10.1016/j.neuron.2015.12.027>
- 587    Rabbitt, P., & Rodgers, B. (1977). What does a man do after he makes an error? An analysis of  
588            response programming. *Quarterly Journal of Experimental Psychology*, 29(4), 727–743.  
589            <https://doi.org/10.1080/14640747708400645>
- 590    Ratcliff, R., Smith, P. L., Brown, S. D., & McKoon, G. (2016). Diffusion Decision Model:  
591            Current Issues and History. *Trends in Cognitive Sciences*, 20(4), 260–281.  
592            <https://doi.org/10.1016/j.tics.2016.01.007>

- 593 Reynaud, A. J., Saleri Lunazzi, C., & Thura, D. (2020). Humans sacrifice decision-making for  
594 action execution when a demanding control of movement is required. *Journal of*  
595 *Neurophysiology*, *124*(2), 497–509. <https://doi.org/10.1152/jn.00220.2020>
- 596 Saleri Lunazzi, C., Reynaud, A. J., & Thura, D. (2021). Dissociating the Impact of Movement  
597 Time and Energy Costs on Decision-Making and Action Initiation in Humans. *Frontiers*  
598 *in Human Neuroscience*, *15*, 715212. <https://doi.org/10.3389/fnhum.2021.715212>
- 599 Shadmehr, R., & Ahmed, A. A. (2020). *Vigor: Neuroeconomics of Movement Control*. The MIT  
600 Press. <https://doi.org/10.7551/mitpress/12940.001.0001>
- 601 Shadmehr, R., Orban de Xivry, J. J., Xu-Wilson, M., & Shih, T.-Y. (2010). Temporal  
602 Discounting of Reward and the Cost of Time in Motor Control. *Journal of Neuroscience*,  
603 *30*(31), 10507–10516. <https://doi.org/10.1523/JNEUROSCI.1343-10.2010>
- 604 Shadmehr, R., Reppert, T. R., Summerside, E. M., Yoon, T., & Ahmed, A. A. (2019). Movement  
605 Vigor as a Reflection of Subjective Economic Utility. *Trends in Neurosciences*, *42*(5),  
606 323–336. <https://doi.org/10.1016/j.tins.2019.02.003>
- 607 Thura, D. (2020). Decision urgency invigorates movement in humans. *Behavioural Brain*  
608 *Research*, *382*, 112477. <https://doi.org/10.1016/j.bbr.2020.112477>
- 609 Thura, D. (2021). Reducing behavioral dimensions to study brain–environment interactions.  
610 *Behavioral and Brain Sciences*, *44*. <https://doi.org/10.1017/S0140525X21000169>
- 611 Thura, D., Cos, I., Trung, J., & Cisek, P. (2014). Context-dependent urgency influences speed-  
612 accuracy trade-offs in decision-making and movement execution. *The Journal of*  
613 *Neuroscience: The Official Journal of the Society for Neuroscience*, *34*(49), 16442–  
614 16454. <https://doi.org/10.1523/JNEUROSCI.0162-14.2014>

- 615 Thura, D., Guberman, G., & Cisek, P. (2017). Trial-to-trial adjustments of speed-accuracy trade-  
616 offs in premotor and primary motor cortex. *Journal of Neurophysiology*, *117*(2), 665–  
617 683. <https://doi.org/10.1152/jn.00726.2016>
- 618 Urai, A. E., de Gee, J. W., Tsetsos, K., & Donner, T. H. (2019). Choice history biases subsequent  
619 evidence accumulation. *ELife*, *8*, e46331. <https://doi.org/10.7554/eLife.46331>
- 620 Yoon, T., Geary, R. B., Ahmed, A. A., & Shadmehr, R. (2018). Control of movement vigor and  
621 decision making during foraging. *Proceedings of the National Academy of Sciences*,  
622 *115*(44), E10476–E10485. <https://doi.org/10.1073/pnas.1812979115>
- 623
